# Supplementary material for: Early life adversity, contact with children’s social care services and educational outcomes at age 16 years: UK birth cohort study with linkage to national administrative records
Source: PubMed Central journal article supplement (PMC6797348; doi:10.1136/bmjopen-2019-030213), 2019-10-07
Supplement: bmjopen-2019-030213.draft_revisions.pdf [file bmjopen-2019-030213.draft_revisions.pdf]

# BMJ Open

BMJ Open is committed to open peer review. As part of this commitment we make the peer review history of every article we publish publicly available.

When an article is published we post the peer reviewers' comments and the authors' responses online. We also post the versions of the paper that were used during peer review. These are the versions that the peer review comments apply to.

The versions of the paper that follow are the versions that were submitted during the peer review process. They are not the versions of record or the final published versions. They should not be cited or distributed as the published version of this manuscript.

BMJ Open is an open access journal and the full, final, typeset and author-corrected version of record of the manuscript is available on our site with no access controls, subscription charges or pay-per-view fees (<http://bmjopen.bmj.com>).

If you have any questions on BMJ Open's open peer review process please email [info.bmjopen@bmj.com](mailto:info.bmjopen@bmj.com)

# BMJ Open

## Early-life adversity, contact with children's social care services, and educational outcomes at age 16 years: UK birth cohort study with linkage to national administrative records

|                               |                                                                                                                                                                                                                                                                                                                                                                                                           |
|-------------------------------|-----------------------------------------------------------------------------------------------------------------------------------------------------------------------------------------------------------------------------------------------------------------------------------------------------------------------------------------------------------------------------------------------------------|
| Journal:                      | <i>BMJ Open</i>                                                                                                                                                                                                                                                                                                                                                                                           |
| Manuscript ID                 | bmjopen-2019-030213                                                                                                                                                                                                                                                                                                                                                                                       |
| Article Type:                 | Research                                                                                                                                                                                                                                                                                                                                                                                                  |
| Date Submitted by the Author: | 05-Mar-2019                                                                                                                                                                                                                                                                                                                                                                                               |
| Complete List of Authors:     | Teyhan, Alison; University of Bristol, Bristol Medical School, Population Health Sciences<br>Boyd, Andy; University of Bristol, Bristol Medical School, Population Health Sciences<br>Wijedasa, Dinithi; University of Bristol, Hadley Centre for Adoption and Foster Care Studies, School for Policy Studies<br>Macleod, John; University of Bristol, Bristol Medical School, Population Health Sciences |
| Keywords:                     | ALSPAC, record linkage, education, social care, looked-after, adolescence                                                                                                                                                                                                                                                                                                                                 |
|                               |                                                                                                                                                                                                                                                                                                                                                                                                           |

SCHOLARONE™  
Manuscripts

1  
2  
3  
4  
5  
6  
7  
8  
9  
10  
11  
12  
13  
14  
15  
16  
17  
18  
19  
20  
21  
22  
23  
24  
25  
26  
27  
28  
29  
30  
31  
32  
33  
34  
35  
36  
37  
38  
39  
40  
41  
42  
43  
44  
45  
46  
47  
48  
49  
50  
51  
52  
53  
54  
55  
56  
57  
58  
59  
60

# Early-life adversity, contact with children's social care services, and educational outcomes at age 16 years: UK birth cohort study with linkage to national administrative records

Alison Teyhan<sup>\*a</sup>, Andy Boyd<sup>a</sup>, Dinithi Wijedasa<sup>b</sup>, John Macleod<sup>a</sup>

\*Corresponding author

Email: [alison.teyhan@bristol.ac.uk](mailto:alison.teyhan@bristol.ac.uk)

Phone: +44 (0)117 331 0058

<sup>a</sup> Population Health Sciences, Bristol Medical School, University of Bristol, Oakfield House,  
Oakfield Grove, Bristol, BS8 2BN, UK

<sup>b</sup> Hadley Centre for Adoption and Foster Care Studies, School for Policy Studies, University of  
Bristol, 8 Priory Road, Bristol, BS8 1TZ, UK

Word count: 3037

**ABSTRACT (248 words)**

**Objectives:** To use record linkage of birth cohort and administrative data to study educational outcomes of children who are looked-after (in public care) and in need (social services involvement), and examine the role of early life factors.

**Setting, Design:** Prospective observational study of children from the Avon Longitudinal Study of Parents and Children (ALSPAC), which recruited pregnant women in and around Bristol, UK in the early 1990s. ALSPAC was linked to the annual Children Looked-After (CLA) Data Return and Children In Need (CIN) Census. Educational outcomes at 16 years were obtained through linkage to the National Pupil Database. These included passing 5+ good GCSEs (grades A\*-C, including English and Maths). Covariates included early-life adversity and social position.

**Participants:** 9545 children from ALSPAC who had complete education and covariate data were included in the main educational outcomes analyses.

**Results:** Overall, of the 12,868 ALSPAC participants linked to NPD data, 137 had a CLA record and a further 209 a CIN record during adolescence. These children were more disadvantaged than their peers and had little active study participation beyond infancy. In the main educational outcomes analyses, achievement of 5+ good GCSEs was low in the CLA (OR 0.14, 95% CI 0.05-0.35) and CIN (0.11, 0.05-0.27) groups relative to their peers.

Measured early-life factors explained little of this difference.

**Conclusions:** Data linkage enabled the study of educational outcomes in children with social services contact. These children had substantially worse educational outcomes relative to their peers, for reasons likely to be multifactorial.

**Key Words:** ALSPAC; record linkage; education; social care; looked-after; adolescence

## Article Summary - Strengths and Limitations

- We link a population-based birth cohort study (ALSPAC) to social care and educational records, and demonstrate that record linkage offers a means to identify vulnerable children in a cohort and increase their inclusion in research.
- The children in ALSPAC who had been looked-after (in public care) were broadly representative in terms of their care characteristics of children nationally of the same age who had been looked-after.
- We were only able to identify children who had been in care or in need during adolescence.
- Cohort data availability for children with social care records in adolescence was low beyond infancy.

## INTRODUCTION

Children with social services contact, including those in public care, are at higher risk of poor outcomes than their peers, including low educational attainment, substance abuse, and mental illness(1-10). The extent to which this reflects early-life adversity prior to contact with services as opposed to later influences is unclear. Outcomes mainly resulting from early adversity may be less amenable to change through social care interventions, requiring alternative prevention strategies. These children are challenging to study using traditional research methods. A recent Children's Commissioner for England report highlights that vulnerable children are 'absent or poorly measured in national studies'(11), and children's social care is a difficult area in which to conduct randomised controlled trials(12). Further, those who experience extreme adversity are likely under-represented in birth cohort studies due to low recruitment and high attrition, and identification of vulnerable children is challenging due to reliance on parental-report.

Children with social services contact in England do however have high levels of administrative data. The term 'in need' refers to children who have been referred to and assessed by social services and found to be 'unlikely to achieve or maintain a reasonable level of health or development, or whose health and development is likely to be significantly or further impaired, without the provision of services; or a child who is disabled'(13). Almost 390,000 children are currently classified as 'in need'(14). Some children in need may enter the public care system and become a 'looked-after' child. Presently over 72,000 children are looked-after(15), with the majority placed with foster carers(1).

While routine statistics using social care data can highlight poor outcomes, e.g. low average educational attainment, they lack information on early-life and family characteristics(1, 16, 17). These types of data are readily available in birth cohort studies. Linking cohort data to

1  
2  
3 social care records could therefore provide a means of identifying children in need and  
4  
5 looked-after without reliance on parental-report. Further, using additional linked data to  
6  
7 measure outcomes potentially enables the child's inclusion in analyses even if their family  
8  
9 have stopped actively participating in the cohort study.  
10  
11

12  
13 We use record linkage to a birth cohort to examine the effect of being in need or looked-after  
14  
15 in adolescence on educational outcomes at age 16 years: the low attainment of many in need  
16  
17 and looked-after children at this age is a concern as it can compound their disadvantaged  
18  
19 childhoods to limit future education, employment, and general life chances(18).  
20  
21

## 22 23 **METHODS**

### 24 25 **Data**

#### 26 27 *Avon Longitudinal Study of Parents and Children (ALSPAC)*

28  
29 Pregnant women living in and around the city of Bristol, UK with expected date of delivery  
30  
31 April 1991 to December 1992 were eligible to participate in ALSPAC. There were 14,541  
32  
33 pregnancies enrolled, resulting in 13,988 children alive at one year, including 13,972  
34  
35 singletons and twins. This 'core sample' was later bolstered by further eligible children: an  
36  
37 additional 713 from age 7-18yrs, and to date 183 since age 18yrs. The mothers, their partners,  
38  
39 and the study children are studied via questionnaires and clinic visits. Teachers also  
40  
41 completed questionnaires on the children. Further details are provided in cohort profiles(19,  
42  
43 20) and searchable data-dictionary(21). For the main analyses on educational outcomes, the  
44  
45 sample was restricted to: core, one child per family, with education data (n=9545, Figure 1).  
46  
47  
48  
49  
50  
51

52  
53 Ethical approval for ALSPAC was obtained from the ALSPAC Ethics and Law Committee  
54  
55 and Local Research Ethics Committees. When study children reached age 18, they were sent  
56  
57 'fair processing' materials which described ALSPAC's intended use of their health and  
58  
59  
60

1  
2  
3 administrative records, and gave a clear means to object(22). Education data were not  
4  
5 extracted for participants who objected, or who were not sent fair processing materials.  
6  
7

### 8 *Linkage data*

9

10  
11 Data on children who are looked-after, or have been referred as a child in need, are collected  
12  
13 annually via the Children Looked-After (CLA) Data Return(23) and the Children in Need  
14  
15 (CIN) Census(24). The CIN Census covers all children referred to children's social services  
16  
17 even if no further action is taken. The CLA Return and the CIN Census have been linked to  
18  
19 the National Pupil Database (NPD), a repository of education data for schools in England(25),  
20  
21 since their 2005/06 and 2008/09 data collections respectively. ALSPAC has an established  
22  
23 link to the NPD, and thus to any post-2005 CLA or post-2008 CIN record for participants in  
24  
25 the NPD. Earlier CLA records were also obtained for those with a post-2005 record.  
26  
27 However, CLA data collection was only on a random one-third sample of looked-after  
28  
29 children from 1998-2003, meaning no records exist for many looked-after children in this  
30  
31 period(23). Insufficient identifiers exist within the CLA dataset to enable linkage of  
32  
33 ALSPAC to pre-2005 CLA records for those without a post-2005 record.  
34  
35  
36  
37  
38

39 We also obtained CLA records for all individuals in the CLA Return of a similar age (born  
40  
41 January 2001-December 2002) to form two comparison groups: (1) ever looked-after in  
42  
43 England (n=43,938); (2) ever looked-after in the four local authorities that approximate the  
44  
45 ALSPAC recruitment area (Bristol City; South Gloucestershire; North Somerset; Bath and  
46  
47 North East Somerset) (n=713).  
48  
49  
50

## 51 **Measures**

### 52 *Educational outcomes*

53  
54

55  
56 Pupils in England study General Certificate of Education (GCSE) courses during Key Stage 4  
57  
58 (KS4) of their education (Years 10 and 11, aged 14-16yrs) and take GCSE exams at the end  
59  
60



1  
2  
3 of Year 11. The oldest ALSPAC children sat their GCSE exams in 2007, the youngest in  
4  
5 2009. Our main outcomes were two measures of attainment. First, a binary measure:  
6  
7 achievement of 5+ good GCSEs (grades A\*-C, including English and Maths). Second, a  
8  
9 continuous measure: capped point score, expressed as a percentage of the maximum possible  
10  
11 capped point score (based on the eight best grades obtained, with each grade assigned a  
12  
13 numerical value)(26). Secondary educational outcomes included: persistent absence ( $\geq 10\%$   
14  
15 of half days); special educational needs (SEN) status (see footnote of Table 2); and school  
16  
17 mobility (whether child joined school during KS4).  
18  
19  
20  
21

### 22 *Contact with children's social care services*

23  
24  
25 Contact with children's social care services (referred to as 'social care status' hereafter) was  
26  
27 summarised in two variables. The first specified whether a child had any post-2005 CLA  
28  
29 record(s) or post-2008 CIN record(s) (i.e. was looked-after or referred to social care services  
30  
31 at any time for which we have linked social care data). The second summarised social care  
32  
33 status during KS4 only. This restriction was necessary for the educational outcomes analyses  
34  
35 to ensure our exposure preceded our outcome, plus these are the only two school years with  
36  
37 CLA data coverage for all children in our sample (Supplementary Table A). By definition  
38  
39 children who are looked-after are also in need but we use 'in need' to refer to children with a  
40  
41 CIN but not a CLA record. The reference group comprised children with a KS4 record in the  
42  
43 NPD who had no linked social care record.  
44  
45  
46  
47  
48

49 Variables related to being in care or in need were derived from the linked data as follows.

50  
51 CIN Census: category of need; age referred. CLA Return: category of need; age first period of  
52  
53 care (POC) started (POC is a period of time when child is continuously looked-after by the  
54  
55 local authority); number of POC and episodes of care (a POC is comprised of 'episodes', each  
56  
57 representing a period of being looked-after under the same legal status and in the same  
58  
59  
60

1  
2  
3 placement); placement type (foster; children's home/residential home/residential school; other  
4  
5 [no further disaggregation possible due to small numbers]).  
6  
7

### 8 *Covariates*

10  
11 These included child age and sex, plus measures related to family socio-economic position  
12  
13 (SEP). Early-life exposures were reported by the mother during pregnancy: age at delivery;  
14  
15 highest educational qualification; financial difficulties; housing tenure; partner status;  
16  
17 smoking; social support; depressive symptoms(27). Later measures of SEP (during KS4)  
18  
19 were obtained from the NPD: receipt of free school meals (FSM)(28); and child's residential  
20  
21 neighbourhood deprivation measured by the Income Deprivation Affecting Children Index  
22  
23 (IDACI)(29). More details in Supplementary Text.  
24  
25  
26  
27

### 28 **Statistical analyses**

29  
30  
31 Descriptive statistics were used to: summarise the social care data linked to ALSPAC  
32  
33 children; compare the ALSPAC looked-after sample to the two non-ALSPAC looked-after  
34  
35 comparison groups; compare child, maternal and SEP characteristics by social care status;  
36  
37 describe questionnaire completion rates by social care status.  
38  
39  
40

41 Associations between social care status and educational outcomes were examined using  
42  
43 multilevel regression models (individual level 1, school level 2). Linear models were used for  
44  
45 capped point score, logistic for attainment of 5+ good GCSEs. Models adjusted for age and  
46  
47 sex (Model 1), then also for KS4 measures [FSM, neighbourhood deprivation, school  
48  
49 mobility] (Model 2), or for early-life exposures (Model 3). We then adjusted for all KS4 and  
50  
51 early-life variables (Model 4). Multiple imputation using chained equations was used to  
52  
53 impute missing data (supplementary Table B) for the educational outcomes analyses sample  
54  
55 (n=9545). 100 datasets were imputed.  
56  
57  
58  
59  
60

1  
2  
3 In sensitivity analyses, models were restricted to children with no SEN (n=8145) or no  
4 disability (n=9506). Social care status at any time was also considered. Finally, we described  
5 associations between social care characteristics (e.g. placement type, reason for being in need)  
6 and capped point score in those with CIN or CLA records: to maximise sample size, we  
7 included all those who had these records at any time and who had capped point score data.  
8  
9  
10  
11  
12  
13  
14

### 15 **Patient and Public Involvement**

16  
17 Patients, the public, and study participants were not directly involved in this study. Some  
18 ALSPAC participants are members of a committee which meets bi-monthly to provide  
19 insights and advice on general ALSPAC study design, methodology and acceptability for  
20 participants.  
21  
22  
23  
24  
25  
26  
27  
28  
29  
30

## 31 **RESULTS**

### 32 **Children in ALSPAC with social care records**

33  
34 Of those with a post-2008 CIN (but no CLA) record (n=209) the most common needs at  
35 referral were child disability, abuse or neglect, and family in acute stress. Of those with a  
36 post-2005 CLA record (n=137), the most common primary need was abuse or neglect  
37 (Supplementary Tables C and D). Median total time in care was 2.6 years. Foster care was  
38 the most common placement type.  
39  
40  
41  
42  
43  
44  
45  
46  
47  
48

### 49 **Comparison to non-ALSPAC looked-after children**

50  
51 The ALSPAC children with CLA records were generally similar to those of children born at  
52 the same time who were ever in care in England (comparison group 1) or in the area in and  
53 around Bristol (comparison group 2) in terms of primary need (Supplementary Table E).  
54  
55  
56  
57  
58  
59 Importantly, many of those who had ever had a CLA record in the two comparison groups  
60

1  
2  
3 (36% of group 1; 42% of group 2) had left care before the age of 12 (the youngest age at  
4  
5 which we were able to link CLA records to ALSPAC).  
6  
7

### 8 **Availability of cohort data**

9

10  
11 Maternal questionnaire response rates were highest for participants with no social care record  
12  
13 and lowest for those with a CLA record at all time points. Differences generally widened  
14  
15 over time (Figure 2). Patterns were similar for partner and child, but not teacher,  
16  
17 questionnaires (supplementary Figures 3a-d).  
18  
19

### 20 **Educational outcomes at 16 years**

21

22  
23 Of the 9545 children in these analyses, 49 had CLA and 64 CIN (no CLA) records during  
24  
25 KS4. These groups were more disadvantaged than their peers in early-life and during KS4  
26  
27 (Table 1). They were more likely to have joined their school recently.  
28  
29

30  
31 Of those with CIN or CLA records, <15% passed 5+ good GCSEs compared to >50% of their  
32  
33 peers. Mean percentage scores were also markedly lower (Table 2). They were more likely  
34  
35 to have SEN and persistent absence rates were higher, particularly for the in need group.  
36  
37

38  
39 Adjustment for school absence, neighbourhood deprivation, and receipt of FSM attenuated  
40  
41 associations slightly for the CIN group but had less of an impact for the CLA group (Table 3).  
42

43  
44 Adjustment for early-life maternal and SEP factors had more of an attenuating effect for the  
45  
46 CLA than the CIN group. Attainment differences between these groups and their peers  
47  
48 remained in the fully adjusted model.  
49

50  
51 In sensitivity analyses, when social care records at any time were considered, patterns were  
52  
53 similar for the CLA group (n=76), while the CIN group (n=148) tended to do better than  
54  
55 when restricted to only those who were in need during KS4 (Table 2). When the sample  
56  
57 excluded those with SEN or disability, results were similar to those of the main analyses  
58  
59 (supplementary tables F and G).  
60

1  
2  
3 Estimates of the relationship between social care characteristics and attainment were  
4  
5 imprecise due to small numbers. Those in foster placements had higher capped percentage  
6  
7 scores (mean 35.9, 95% CI 29.3 to 42.5, n=60) than those in children's/residential  
8  
9 homes/residential schools (25.0, 12.3 to 37.8, n=12). With regards need status, for both the  
10  
11 CLA and CIN groups, 'child disability' was associated with the lowest attainment, and  
12  
13 'parental illness/disability' the highest but confidence intervals were wide and overlapping.  
14  
15  
16  
17  
18  
19  
20  
21  
22  
23  
24  
25  
26  
27  
28  
29  
30  
31  
32  
33  
34  
35  
36  
37  
38  
39  
40  
41  
42  
43  
44  
45  
46  
47  
48  
49  
50  
51  
52  
53  
54  
55  
56  
57  
58  
59  
60

For peer review only

**Table 1: Summary of maternal, family and child characteristics, by social care status of child during Key Stage 4**

|                                                                               |                         | Child's social care status during KS4 |                             |                    |
|-------------------------------------------------------------------------------|-------------------------|---------------------------------------|-----------------------------|--------------------|
|                                                                               |                         | No CLA/CIN record<br>n=9432           | CIN (no CLA) record<br>n=64 | CLA record<br>n=49 |
| <b>Maternal and family characteristics during pregnancy<sup>1</sup></b>       |                         | % (95% CI)                            |                             |                    |
| Maternal age (at delivery)                                                    | <=23 years              | 18.4 (17.7-19.2)                      | 39.1 (27.7-51.8)            | 28.6 (17.4-43.2)   |
|                                                                               | >33 years               | 12.3 (11.6-12.9)                      | 7.8 (3.2-17.8)              | 14.3 (6.8-27.6)    |
| Relationship status                                                           | Married                 | 75.0 (74.1-75.9)                      | 53.7 (40.5-66.8)            | 49.8 (34.6-65.1)   |
|                                                                               | Resident partner        | 16.5 (15.7-17.3)                      | 16.7 (6.5-26.9)             | 27.3 (13.3-41.3)   |
|                                                                               | Non-resident/no partner | 8.5 (7.9-9.1)                         | 29.6 (17.5-41.7)            | 22.9 (9.6-36.2)    |
| Highest maternal education                                                    | A Level or degree       | 30.7 (29.7-31.7)                      | 10.8 (2.5-19.1)             | 11.4 (1.1-21.8)    |
|                                                                               | O Level                 | 36.5 (35.5-37.5)                      | 40.2 (26.8-53.7)            | 26.1 (11.2-40.9)   |
|                                                                               | Vocational/none         | 32.8 (31.8-33.8)                      | 48.9 (35.2-62.7)            | 62.5 (46.4-78.6)   |
| Financial difficulties                                                        | Highest quartile        | 21.2 (20.3-22.1)                      | 41.7 (27.8-55.7)            | 46.2 (29.3-63.2)   |
| Housing tenure                                                                | Owned/mortgaged         | 73.7 (72.8-74.6)                      | 54.1 (41.2-67.1)            | 33.2 (18.5-48.0)   |
| Maternal smoking                                                              | Yes                     | 26.6 (25.7-27.6)                      | 41.6 (28.2-55.0)            | 59.8 (43.5-76.2)   |
| Depression score                                                              | Highest quartile        | 23.3 (22.4-24.3)                      | 29.5 (16.5-42.6)            | 48.4 (32.3-64.5)   |
| Low social support                                                            | Yes                     | 10.3 (9.6-11.0)                       | 21.3 (9.0-33.6)             | 26.8 (11.2-42.4)   |
| <b>Child, school and neighbourhood characteristics during KS4<sup>1</sup></b> |                         | % or mean (95% CI)                    |                             |                    |
| Sex                                                                           | Female                  | 49.6 (49.4-51.4)                      | 51.6 (39.1-63.8)            | 49.0 (36.8-65.1)   |
| Age at start of Year 11                                                       | Mean (years)            | 15.5 (15.4-15.5)                      | 15.5 (15.4-15.6)            | 15.5 (15.4-15.5)   |
| In receipt of free school meals                                               | Yes                     | 6.1 (5.6-6.6)                         | 26.6 (17.0-39.0)            | 10.2 (4.2-22.9)    |
| Joined school during KS4                                                      | Yes                     | 1.4 (1.2-1.6)                         | 7.8 (3.2-17.8)              | 12.2 (5.4-25.3)    |
| Neighbourhood deprivation (IDACI)                                             | Low, <10%               | 43.9 (42.7-44.9)                      | 20.3 (12.0-32.3)            | 28.6 (17.4-43.2)   |
|                                                                               | High, >=40%             | 10.1 (9.5-10.8)                       | 25.0 (15.7-37.4)            | 20.4 (11.1-34.5)   |

<sup>1</sup> For brevity, not all categories are presented for each categorical variable.

**Table 2: Educational attainment, persistent absence, and special educational needs by child social care status**

|                                                     | Social care status during KS4 |                             |                    | Social care status any time |                              |                    |
|-----------------------------------------------------|-------------------------------|-----------------------------|--------------------|-----------------------------|------------------------------|--------------------|
|                                                     | No CLA/CIN record<br>n=9432   | CIN (no CLA) record<br>n=64 | CLA record<br>n=49 | No CLA/CIN record<br>n=9321 | CIN (no CLA) record<br>n=148 | CLA record<br>n=76 |
| <b>Educational Attainment</b>                       | % or mean (95% CI)            |                             |                    | % or mean (95% CI)          |                              |                    |
| 5+ A*-C GCSEs including English & Maths             | 53.0 (52.0-54.0)              | 10.9 (5.2-21.6)             | 12.2 (5.4-25.3)    | 53.3 (52.3-54.4)            | 19.6 (13.9-26.9)             | 10.5 (5.3-19.9)    |
| Capped percentage point score                       | 68.9 (68.5-69.3)              | 37.4 (31.3-43.4)            | 34.9 (27.4-42.3)   | 69.1 (68.7-69.5)            | 47.7 (43.7-51.7)             | 33.9 (28.2-39.5)   |
| <b>Special Educational Needs (SEN)</b>              |                               |                             |                    |                             |                              |                    |
| School action <sup>1</sup>                          | 8.5 (8.0-9.1)                 | 12.5 (6.3-23.4)             | n<5                | 8.4 (7.9-9.0)               | 16.2 (11.1-23.1)             | 9.2 (4.4-18.4)     |
| School action plus <sup>2</sup>                     | 3.1 (2.8-3.5)                 | 15.6 (8.5-27.0)             | 24.5 (14.2-38.9)   | 3.1 (2.7-3.4)               | 8.1 (4.6-13.8)               | 21.1 (13.2-31.9)   |
| Statement of Special Educational Needs <sup>3</sup> | 2.4 (2.1-2.8)                 | 46.9 (34.8-59.4)            | 24.5 (14.2-38.9)   | 2.3 (19.8-2.6)              | 22.3 (16.2-29.8)             | 35.5 (25.4-47.1)   |
| <b>Persistent absence</b>                           | 6.8 (6.3-7.3)                 | 32.8 (22.2-45.5)            | 18.4 (9.6-32.3)    | 6.7 (6.2-7.2)               | 19.6 (13.9-26.9)             | 21.1 (13.2-31.9)   |

<sup>1</sup> School Action (SA) is used when there is evidence that a child is not making progress at school and there is a need for action to be taken to meet learning difficulties. This can include involvement of extra teachers, use of different learning materials, special equipment or a different teaching strategy.

<sup>2</sup> School Action Plus (SA+) used where SA has not been able to help the child make adequate progress. The school has sought external services from the local education authority (LEA), the local health authority, or social services to help the child make adequate progress (e.g. speech and language therapist, educational psychologist etc.).

<sup>3</sup> If the additional help provided by SA+ is not enough then the child's school or parents can apply to the LEA for a Statutory Assessment of the child's SEN in order to try and obtain a Statement of SEN. The 'statement' is a document which sets out a child's SEN and any additional help that the child should receive. A Statement is normally made when all the educational provision required to meet a child's needs cannot reasonably be met by the resources within a child's school at SA+.

**Table 3: Association between child social care status and educational outcomes in adjusted models**

| Attainment Outcome                      | Care status during KS4 | Model 1 <sup>1</sup>         | Model 2 <sup>2</sup>           | Model 3 <sup>3</sup>                  | Model 4 <sup>4</sup>            |
|-----------------------------------------|------------------------|------------------------------|--------------------------------|---------------------------------------|---------------------------------|
|                                         |                        | (Age and Sex)<br>OR (95% CI) | (KS4 variables)<br>OR (95% CI) | (Early-life variables)<br>OR (95% CI) | (Fully adjusted)<br>OR (95% CI) |
| 5+ A*-C GCSEs including English & Maths | Not CIN or CLA         | Ref                          | Ref                            | Ref                                   | Ref                             |
|                                         | CIN (not CLA)          | 0.11 (0.05-0.27)             | 0.17 (0.07-0.40)               | 0.15 (0.06 to 0.36)                   | 0.19 (0.08-0.46)                |
|                                         | CLA                    | 0.14 (0.05-0.35)             | 0.14 (0.06-0.36)               | 0.25 (0.10 to 0.63)                   | 0.24 (0.09-0.63)                |
|                                         |                        | Coeff (95% CI)               | Coeff (95% CI)                 | Coeff (95% CI)                        | Coeff (95% CI)                  |
| Capped percentage point score           | Not CIN or CLA         | Ref                          | Ref                            | Ref                                   | Ref                             |
|                                         | CIN (not CLA)          | -22.1 (-26.8 to -17.5)       | -14.1 (-18.4 to -9.9)          | -18.5 (-22.8 to -14.2)                | -13.2 (-17.3 to -9.2)           |
|                                         | CLA                    | -28.4 (-33.5 to -23.2)       | -25.0 (-29.7 to -20.3)         | -21.8 (-26.5 to -17.1)                | -20.4 (-24.9 to -16.0)          |

<sup>1</sup>Adjusted for child age and sex

<sup>2</sup>Adjusted for child age and sex, plus KS4 time-point variables (persistent school absence, in receipt of free school meals, school mobility, IDACI of residential neighbourhood)

<sup>3</sup>Adjusted for child age and sex, plus early-life [maternal and SEP] variables (maternal age at delivery, education, partner status, housing tenure, financial difficulties, smoking, depression, social support)

<sup>4</sup>Adjusted for child age and sex, plus KS4 and early life variables



## DISCUSSION

Children who were looked-after or in need during KS4 had low attainment at age 16.

Measured early-life exposures were not a major explanatory factor. We believe this is the first time linkage to the CLA Return and CIN Census has been used to identify birth cohort participants who were looked-after or in need during adolescence. As linkage data were also used for outcome measures, participants could be included even if their families no longer actively participated in the cohort study. Record linkage therefore allowed vulnerable children to not only be included in research but to be the focus of it. However, the identification and inclusion of in need and looked-after children in research using record linkage does have challenges.

For cohort studies in England with relevant permissions, linkage to the CLA Return and CIN Census via the NPD offers a convenient means of identifying participants who have been in need or looked-after. For cohorts younger than ALSPAC, this method would allow identification of social care records that cover most, if not all, of participants' childhoods. However, in ALSPAC we were only able to link to records covering a period during adolescence. Consequently, outcomes at younger ages cannot be examined by social care status in ALSPAC using this method. Of the looked-after children in England the same age as the ALSPAC participants, we found around 40% had left the care system by the age of 12. Consequently, our reference group likely includes children who were looked-after or in need at younger ages only.

Examination of questionnaire response rates showed the value of using linked outcome data to increase the inclusion of vulnerable children in research: there was little questionnaire data available beyond infancy for participants with social care records in adolescence. In this current study, we examined educational outcomes at age 16, obtained from the NPD. The

1  
2  
3 association between social care status and other later outcomes available from linked data  
4  
5 could also be investigated using ALSPAC, such as mental illness or entry into higher  
6  
7 education.  
8  
9

10  
11 ALSPAC participants with CLA and CIN records in adolescence had lower educational  
12  
13 attainment than their peers in the reference group. In the most recent national data available,  
14  
15 attainment patterns by social care status broadly reflect these findings(1). We found  
16  
17 persistent absence rates to be considerably lower for those looked-after than those in need  
18  
19 during KS4. Similarly, in the national data (on pupils of all ages) 9% of looked-after children  
20  
21 were persistent absentees and 28% of children in need(1). Therefore, although our  
22  
23 participants were in KS4 around 10 years ago and the number with social care records small,  
24  
25 the patterning of educational characteristics by care status is broadly similar to the present-  
26  
27 day situation.  
28  
29

30  
31  
32 Using both ALSPAC questionnaire data and measures from the NPD, we found a persistence  
33  
34 of disadvantage from early-life to adolescence for participants with CIN and CLA records.  
35  
36 Social disadvantage is known to be strongly associated with poorer educational  
37  
38 attainment(30, 31), and our SEP measures were strongly related to the educational outcomes.  
39  
40 Adjustment for them attenuated associations slightly but the low attainment of the CLA and  
41  
42 CIN groups remained. We are not considering the SEP measures as confounders but rather  
43  
44 part of the complex causal pathway from early-life adversity through to poor educational  
45  
46 attainment. Little of the poor educational outcomes in the looked-after and in need groups  
47  
48 appeared to be explained by the early-life exposures we considered, suggesting there is scope  
49  
50 for later experiences, including social care, to improve outcomes.  
51  
52  
53

54  
55  
56 While aspects of care itself could be important contributors to educational outcomes,  
57  
58 ascertaining direction of causality in the relationship between child behaviours, care  
59  
60

1  
2  
3 characteristics, and educational outcomes is difficult. As expected, we found children in  
4 foster care had higher attainment than those not in family-based care: the latter children are  
5 likely to be those whose foster placements have broken down, reflecting complex additional  
6 needs and challenging behaviours. Further, foster carers may have greater commitment and  
7 longer-term interest in the child than group care staff(32). We were unable to consider  
8 placement stability, which has previously been shown to be beneficial(33). However, in  
9 concordance with previous studies, school mobility was associated with lower attainment(34,  
10 35) and children with CLA or CIN records were much more likely to have changed school  
11 during KS4 than their peers.

12  
13  
14  
15  
16  
17  
18  
19  
20  
21  
22  
23  
24  
25  
26  
27  
28  
29  
30  
31  
32  
33  
34  
35  
36  
37  
38  
39  
40  
41  
42  
43  
44  
45  
46  
47  
48  
49  
50  
51  
52  
53  
54  
55  
56  
57  
58  
59  
60

The relatively high proportion of looked-after and in need children with SEN or disability did not appear to explain the low average attainment of these groups. Similarly, in the national data looked-after children with no identified SEN made less educational progress than non-looked-after children(1). It is important to note that the attainment gap between looked-after and in need children and their peers is apparent from a young age, often before the child enters care(1, 33). Being looked-after may not be the principal cause of poor attainment, rather it is a marker of extreme childhood adversity, which is itself associated with poor outcomes. Being in care is often beneficial for a child's education(17, 18, 33).

Strengths of this study include the use of a novel method to identify vulnerable adolescents in a population-based cohort, and objective outcome measures. Limitations include incomplete ascertainment of social care record status, little cohort data beyond early childhood for those with social care records, and small numbers. Children who experience the most disadvantaged starts in life are likely under-represented in ALSPAC as their mothers would have been least likely to attend antenatal appointments, which is where many mothers were recruited to the study.

## Conclusions

Data linkage provides a means of identifying children with social services contact in cohort studies and of increasing their inclusion in research. The poor educational outcomes of the ALSPAC adolescents with social care records did not appear to be substantially explained by early-life exposures prior to contact with children's social care services, suggesting there may be scope for later interventions to make a difference.

For peer review only

## Acknowledgments

We are extremely grateful to all the families who took part in this study, the midwives for their help in recruiting them, and the whole ALSPAC team, which includes interviewers, computer and laboratory technicians, clerical workers, research scientists, volunteers, managers, receptionists and nurses.

## Conflicts of interest

JM is a foster carer. AT, AB and DW have no conflicts of interest to declare.

## Funding

Core support for ALSPAC is provided by the UK Medical Research Council and Wellcome (Grant reference: 102215/2/13/2) and the University of Bristol. The Wellcome Trust (WT086118) funded ALSPACs linkage infrastructure through the Project to Enhance ALSPAC through Record Linkage (PEARL). This work was supported by the Elizabeth Blackwell Institute for Health Research, University of Bristol and the Wellcome Trust Institutional Strategic Support Fund (Grant number: 105612/Z/14/Z).

## Contributor Statement

JM and AB conceived the study, and AT and JM developed the research question. AT conducted the analyses, interpreted the data and drafted the manuscript. JM and DW helped interpret the data and critically revised the paper. AB critically revised the paper. All authors have read and approved this final version.

## Data Sharing Statement

The ALSPAC data management plan (available here:

[http://www.bristol.ac.uk/alspac/researchers/data-access/ documents/alspac-datamanagement-](http://www.bristol.ac.uk/alspac/researchers/data-access/documents/alspac-datamanagement-)

1  
2  
3 plan.pdf) describes in detail the policy regarding data sharing, which is through a system of  
4  
5 managed open access.  
6  
7  
8  
9  
10  
11  
12  
13  
14  
15  
16  
17  
18  
19  
20  
21  
22  
23  
24  
25  
26  
27  
28  
29  
30  
31  
32  
33  
34  
35  
36  
37  
38  
39  
40  
41  
42  
43  
44  
45  
46  
47  
48  
49  
50  
51  
52  
53  
54  
55  
56  
57  
58  
59  
60

For peer review only

## REFERENCES

1. Department for Education, National Statistics. Outcomes for Children Looked After by Local Authorities in England, as at 31 March 2016 (SRF 12/2017). 2017 [Available from: [https://www.gov.uk/government/uploads/system/uploads/attachment\\_data/file/602087/SFR12\\_2017\\_Text.pdf](https://www.gov.uk/government/uploads/system/uploads/attachment_data/file/602087/SFR12_2017_Text.pdf)].
2. Ford T, Vostanis P, Meltzer H, Goodman R. Psychiatric disorder among British children looked after by local authorities: comparison with children living in private households. *The British Journal of Psychiatry*. 2007;190(4):319-25.
3. Oswald SH, Heil K, Goldbeck L. History of Maltreatment and Mental Health Problems in Foster Children: A Review of the Literature. *Journal of Pediatric Psychology*. 2010;35(5):462-72.
4. Ward J, Henderson Z, Pearson G. One problem among many: drug use among care leavers in transition to independent living 2003 [Available from: [http://www.drugsandalcohol.ie/5584/1/Home\\_Office\\_Research\\_Study\\_260\\_One\\_problem\\_among\\_many.pdf](http://www.drugsandalcohol.ie/5584/1/Home_Office_Research_Study_260_One_problem_among_many.pdf)].
5. Viner RM, Taylor B. Adult Health and Social Outcomes of Children Who Have Been in Public Care: Population-Based Study. *Pediatrics*. 2005;115(4):894-9.
6. Botchway SK, Quigley MA, Gray R. Pregnancy-associated outcomes in women who spent some of their childhood looked after by local authorities: findings from the UK Millennium Cohort Study. *BMJ Open*. 2014;4(12).
7. Bellis MA, Lowey H, Leckenby N, Hughes K, Harrison D. Adverse childhood experiences: retrospective study to determine their impact on adult health behaviours and health outcomes in a UK population. *Journal of Public Health*. 2014;36(1):81-91.
8. Hughes K, Lowey H, Quigg Z, Bellis MA. Relationships between adverse childhood experiences and adult mental well-being: results from an English national household survey. *BMC Public Health*. 2016;16(1):222.
9. Plant DT, Jones FW, Pariante CM, Pawlby S. Association between maternal childhood trauma and offspring childhood psychopathology: mediation analysis from the ALSPAC cohort. *The British Journal of Psychiatry*. 2017.
10. Teyhan A, Wijedasa D, Macleod J. Adult psychosocial outcomes of men and women who were looked-after or adopted as children: prospective observational study. *BMJ Open*. 2018.
11. Children's commissioner for England. On measuring the number of vulnerable children in England 2017 [Available from: <https://www.childrenscommissioner.gov.uk/wp-content/uploads/2017/07/CCO-On-vulnerability-Overveiw-2.pdf>].
12. Mezey G, Robinson F, Campbell R, Gillard S, Macdonald G, Meyer D, et al. Challenges to undertaking randomised trials with looked after children in social care settings. *Trials*. 2015;16(1):206.
13. Department for Education. Children in need census 2017 to 2018. Guide for local authorities - version 1.2 2018 [Available from: [https://assets.publishing.service.gov.uk/government/uploads/system/uploads/attachment\\_data/file/695113/CIN17-18\\_Guide\\_v1.2-web\\_version.pdf](https://assets.publishing.service.gov.uk/government/uploads/system/uploads/attachment_data/file/695113/CIN17-18_Guide_v1.2-web_version.pdf)].
14. Department for Education. Characteristics of children in need: 2016 to 2017 England (SFR 61/2017)2017 Accessed February 2018. Available from: [https://www.gov.uk/government/uploads/system/uploads/attachment\\_data/file/656395/SFR61-2017\\_Main\\_text.pdf](https://www.gov.uk/government/uploads/system/uploads/attachment_data/file/656395/SFR61-2017_Main_text.pdf).
15. Department for Education, National Statistics. Children looked after in England (including adoption), year ending 31 March 2017 (SFR 20/2017)2017 Accessed February 2018. Available from: [https://www.gov.uk/government/uploads/system/uploads/attachment\\_data/file/664995/SFR50\\_2017-Children\\_looked\\_after\\_in\\_England.pdf](https://www.gov.uk/government/uploads/system/uploads/attachment_data/file/664995/SFR50_2017-Children_looked_after_in_England.pdf).
16. Fletcher J, Strand S, Thomas S. The Educational Progress of Looked After Children in England.

1  
2  
3 Technical Report 1: Secondary School Progress and Attainment 2015 [Available from:

4 [http://reescentre.education.ox.ac.uk/wordpress/wp-](http://reescentre.education.ox.ac.uk/wordpress/wp-content/uploads/2015/11/EducationalProgressLookedAfterChildrenTechnical-Report-1_Nov2015.pdf)  
5 [content/uploads/2015/11/EducationalProgressLookedAfterChildrenTechnical-Report-](http://reescentre.education.ox.ac.uk/wordpress/wp-content/uploads/2015/11/EducationalProgressLookedAfterChildrenTechnical-Report-1_Nov2015.pdf)  
6 [1\\_Nov2015.pdf](http://reescentre.education.ox.ac.uk/wordpress/wp-content/uploads/2015/11/EducationalProgressLookedAfterChildrenTechnical-Report-1_Nov2015.pdf).

7  
8 17. Sebba J, Berridge D, Luke N, Fletcher J, Bell K, Strand S, et al. The Educational Progress of  
9 Looked After Children in England: Linking Care and Educational Data 2015 [Available from:

10 [http://reescentre.education.ox.ac.uk/wordpress/wp-](http://reescentre.education.ox.ac.uk/wordpress/wp-content/uploads/2015/11/EducationalProgressLookedAfterChildrenOverviewReport_Nov2015.pdf)  
11 [content/uploads/2015/11/EducationalProgressLookedAfterChildrenOverviewReport\\_Nov2015.pdf](http://reescentre.education.ox.ac.uk/wordpress/wp-content/uploads/2015/11/EducationalProgressLookedAfterChildrenOverviewReport_Nov2015.pdf).

12 18. Berridge D. Educating young people in care: What have we learned? Children and Youth  
13 Services Review. 2012;34(6):1171-5.

14 19. Boyd A, Golding J, Macleod J, Lawlor DA, Fraser A, Henderson J, et al. Cohort Profile: The  
15 'Children of the 90s'—the index offspring of the Avon Longitudinal Study of Parents and Children.  
16 International Journal of Epidemiology. 2012.

17 20. Fraser A, Macdonald-Wallis C, Tilling K, Boyd A, Golding J, Davey Smith G, et al. Cohort  
18 Profile: The Avon Longitudinal Study of Parents and Children: ALSPAC mothers cohort. International  
19 Journal of Epidemiology. 2013;42(1):97-110.

20 21. ALSPAC. Data Dictionary [Available from: [http://bristol.ac.uk/alspac/researchers/data-](http://bristol.ac.uk/alspac/researchers/data-access/data-dictionary/)  
21 [access/data-dictionary/](http://bristol.ac.uk/alspac/researchers/data-access/data-dictionary/).

22 22. Boyd A, Tilling K, Cornish R, Davies A, Humphries K, Macleod J. Professionally designed  
23 information materials and telephone reminders improved consent response rates: evidence from an  
24 RCT nested within a cohort study. Journal of Clinical Epidemiology. 2015;68(8):877-87.

25 23. Mc Grath-Lone L, Harron K, Dearden L, Nasim B, Gilbert R. Data Resource Profile: Children  
26 Looked After Return (CLA). International Journal of Epidemiology. 2016;45(3):716-7f.

27 24. Emmott E, Jay M, Woodman J. Cohort Profile: Children in Need Census (CIN) Records of  
28 Vulnerable Children in England (pre-print). BMJ Open. 2018.

29 25. Department for Education. The National Pupil Database: User Guide 2015 [Available from:  
30 [www.gov.uk/government/uploads/system/uploads/attachment\\_data/file/472700/NPD\\_user\\_guide.](http://www.gov.uk/government/uploads/system/uploads/attachment_data/file/472700/NPD_user_guide.pdf)  
31 [pdf](http://www.gov.uk/government/uploads/system/uploads/attachment_data/file/472700/NPD_user_guide.pdf).

32 26. National Pupil Database in England Wiki. KS4 2016 [Available from:  
33 <https://nationalpupildatabase.wikispaces.com/KS4>.

34 27. Thorpe K. A study of the use of the Edinburgh postnatal depression scale with parent groups  
35 outside the postpartum period. Journal of Reproductive and Infant Psychology. 1993;11(2):119-25.

36 28. GOV.UK. Apply for free school meals 2018 [Available from: [https://www.gov.uk/apply-free-](https://www.gov.uk/apply-free-school-meals)  
37 [school-meals](https://www.gov.uk/apply-free-school-meals).

38 29. Department for Communities and Local Government. The English Indices of Deprivation  
39 2015 [Available from:  
40 [https://www.gov.uk/government/uploads/system/uploads/attachment\\_data/file/465791/English\\_](https://www.gov.uk/government/uploads/system/uploads/attachment_data/file/465791/English_Indices_of_Deprivation_2015_-_Statistical_Release.pdf)  
41 [Indices\\_of\\_Deprivation\\_2015\\_-\\_Statistical\\_Release.pdf](https://www.gov.uk/government/uploads/system/uploads/attachment_data/file/465791/English_Indices_of_Deprivation_2015_-_Statistical_Release.pdf).

42 30. Hirsch D. Experiences of poverty and educational disadvantage 2007 [Available from:  
43 <https://www.jrf.org.uk/report/experiences-poverty-and-educational-disadvantage>.

44 31. Goodman A, Gregg P. Poorer children's educational attainment: how important are attitudes  
45 and behaviour? 2010 [Available from: [https://www.jrf.org.uk/report/poorer-children%E2%80%99s-](https://www.jrf.org.uk/report/poorer-children%E2%80%99s-educational-attainment-how-important-are-attitudes-and-behaviour)  
46 [educational-attainment-how-important-are-attitudes-and-behaviour](https://www.jrf.org.uk/report/poorer-children%E2%80%99s-educational-attainment-how-important-are-attitudes-and-behaviour).

47 32. Lo A, Roben CKP, Maier C, Fabian K, Shauffer C, Dozier M. "I want to be there when he  
48 graduates:" Foster parents show higher levels of commitment than group care providers. Children  
49 and Youth Services Review. 2015;51:95-100.

50 33. Luke N, Sinclair I, O'Higgins A. The Educational Progress of Looked After Children in England.  
51 Technical report 2: Relating Care to Educational Attainment and Progress 2015 [Available from:  
52 [https://weblearn.ox.ac.uk/access/content/group/5cacf183-ce54-47f0-9f17-](https://weblearn.ox.ac.uk/access/content/group/5cacf183-ce54-47f0-9f17-d4b0fe1cf292/EducationalProgressLookedAfterChildrenTechnical%20Report%202_Nov2015.pdf)  
53 [d4b0fe1cf292/EducationalProgressLookedAfterChildrenTechnical%20Report%202\\_Nov2015.pdf](https://weblearn.ox.ac.uk/access/content/group/5cacf183-ce54-47f0-9f17-d4b0fe1cf292/EducationalProgressLookedAfterChildrenTechnical%20Report%202_Nov2015.pdf).



- 1  
2  
3 34. Hutchings HA, Evans A, Barnes P, Demmler J, Heaven M, Hyatt MA, et al. Do children who  
4 move home and school frequently have poorer educational outcomes in their early years at school?  
5 An anonymised cohort study. PloS one. 2013;8(8):e70601.  
6  
7 35. Strand S, Demie F. Pupil mobility, attainment and progress in secondary school. Educational  
8 Studies. 2007;33(3):313-31.  
9  
10  
11  
12  
13  
14  
15  
16  
17  
18  
19  
20  
21  
22  
23  
24  
25  
26  
27  
28  
29  
30  
31  
32  
33  
34  
35  
36  
37  
38  
39  
40  
41  
42  
43  
44  
45  
46  
47  
48  
49  
50  
51  
52  
53  
54  
55  
56  
57  
58  
59  
60

For peer review only

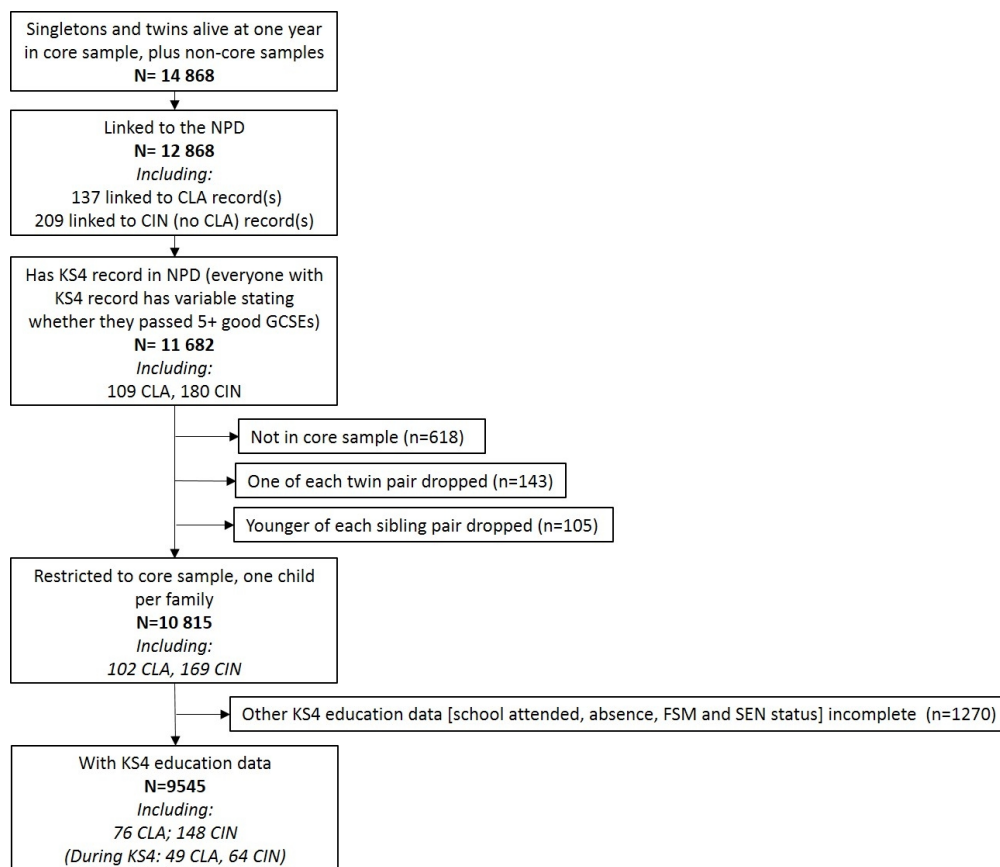

Figure 1 - Flow Chart of Sample

218x189mm (150 x 150 DPI)

1  
2  
3  
4  
5  
6  
7  
8  
9  
10  
11  
12  
13  
14  
15  
16  
17  
18  
19  
20  
21  
22  
23  
24  
25  
26  
27  
28  
29  
30  
31  
32  
33  
34  
35  
36  
37  
38  
39  
40  
41  
42  
43  
44  
45  
46  
47  
48  
49  
50  
51  
52  
53  
54  
55  
56  
57  
58  
59  
60

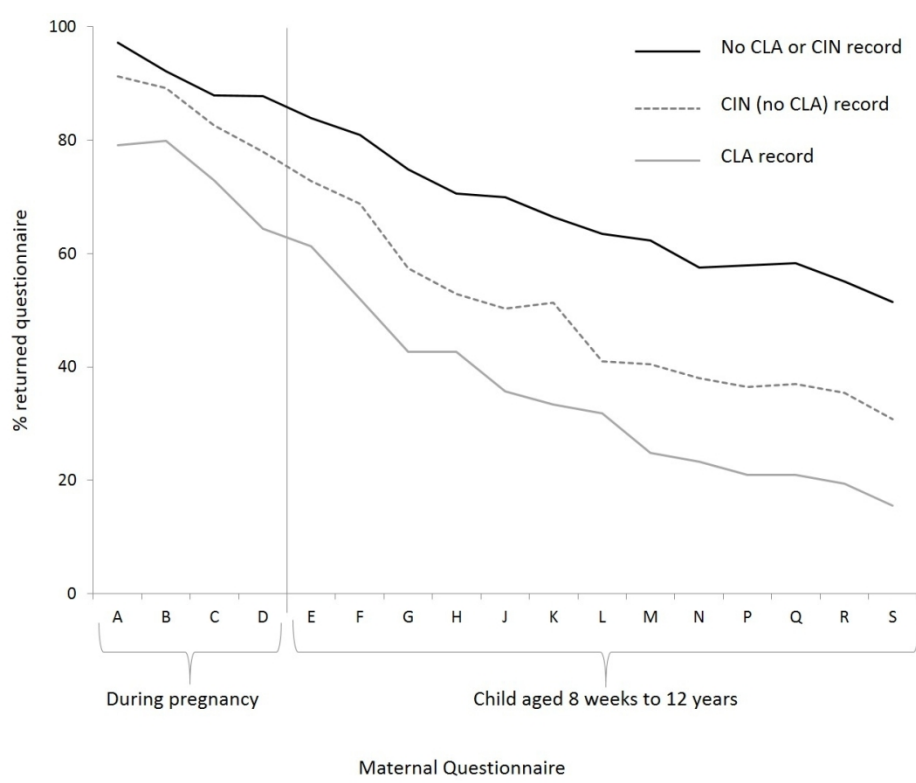

Notes on figure:  
 Sample restricted to mothers in the core sample, whose child has been linked to the National Pupil Database.  
 Mothers may not have completed every question within each questionnaire.

Figure 2 - Maternal questionnaire response rates by child social care status  
 231x223mm (150 x 150 DPI)

## Supplementary Text - Additional detail on covariates

- **Early-life, maternal and family characteristics**

The following maternal, family and socioeconomic measures were reported by the mothers during their pregnancy with the study child via postal questionnaires. The categories for each variable are given in parenthesis following the variable name.

**Highest educational qualification** (university degree/A level; O level; vocational/none)

**Financial Difficulties** (quartiles of score with range 0–40, where 0 is no financial difficulties)

**Housing tenure** (owned/mortgaged; private rent; council rent; other)

**Partner status** (husband; live with partner; do not live with partner/no partner)

**Smoking during pregnancy** (no; yes)

**Low social support** - measured by response to 10 items with a low score defined as being in the bottom 10% (no; yes).

**Maternal depression** - measured by the Edinburgh Postnatal Depression Scale. Although this measure was originally designed for use with postnatal women, none of the 10 items is specific to this period and it has been validated for use at other times; it was chosen as it does not contain somatic items that could confound normal symptoms in pregnancy with depression (27). Quartiles were derived.

- **Proxy measures of socio-economic position when child aged 16**

The following measures were obtained from the National Pupil Database.

1  
2  
3 **Child in receipt of free school meals (FSM)** - eligibility is based on low parental income

4  
5 (28) (no; yes)

6  
7  
8 **Child's residential neighbourhood deprivation** - measured by the Income Deprivation

9  
10 Affecting Children Index (IDACI) (29), which gives the proportion of children (<0-15yrs) in

11  
12 a neighbourhood (lower super output area, average population 1500) who live in a low

13  
14 income family (<10%; 10 to <20%; 20 to <30%; 40%+).

15  
16  
17  
18  
19  
20  
21  
22  
23  
24  
25  
26  
27  
28  
29  
30  
31  
32  
33  
34  
35  
36  
37  
38  
39  
40  
41  
42  
43  
44  
45  
46  
47  
48  
49  
50  
51  
52  
53  
54  
55  
56  
57  
58  
59  
60

For peer review only

## Supplementary (online only) Tables

**Table A:** Summary of CLA and CIN data availability by year and period of birth

**Table B:** Summary of early-life (maternal and family) variables before and after multiple imputation

**Table C:** Summary of CIN data for ALSPAC participants linked to a post-2008 CLA record

**Table D:** Summary of care data for ALSPAC participants linked to a post-2005 CLA record

**Table E:** Comparison of care characteristics between ALSPAC CLA participants and CLA individuals in general population (in ALSPAC area and in England) of same age.

**Table F:** Educational attainment, absence, and special educational needs by care status – no SEN

**Table G:** Educational attainment, absence, and special educational needs by care status – no disability

**Table A: Summary of CLA and CIN data availability by year and period of birth**

| Period of birth                | Expected school year in March of each year <sup>1</sup> |                            |                            |                            |                     |                     |
|--------------------------------|---------------------------------------------------------|----------------------------|----------------------------|----------------------------|---------------------|---------------------|
|                                | 2006 <sup>2</sup>                                       | 2007 <sup>2</sup>          | 2008 <sup>2</sup>          | 2009 <sup>2,3</sup>        | 2010 <sup>2,3</sup> | 2011 <sup>2,3</sup> |
| April 1991 to August 1991      | Year 10                                                 | <b>Year 11<sup>4</sup></b> | Year 12                    | Year 13                    |                     |                     |
| September 1991 to August 1992  | Year 9                                                  | Year 10                    | <b>Year 11<sup>4</sup></b> | Year 12                    | Year 13             |                     |
| September 1992 to January 1993 | Year 8                                                  | Year 9                     | Year 10                    | <b>Year 11<sup>4</sup></b> | Year 12             | Year 13             |

<sup>1</sup> The school year in England runs from September to July. In contrast, the CLA and CIN data collection year runs from April to March. For example, the 2006 CLA dataset would cover the period from April 2005 to March 2006; the oldest ALSPAC participants would have been in Year 10 in March 2006, and the youngest in Year 8.

<sup>2</sup> CLA data linked to NPD available

<sup>3</sup> CIN data linked to NPD available

<sup>4</sup> GCSE exams are taken in May/June of Year 11.

#### **Determining who had CIN record during KS4:**

For the CIN data, the youngest cohort participants were in Year 11 at the time of the earliest CIN data collection and they were coded as being 'in need during KS4' if they had a CIN record. However, the majority of the cohort were already in Year 12 or 13 at this time, and so we calculated the age they had been referred, and identified those who had been referred before they sat their KS4 exams (age on the 1<sup>st</sup> June of the year they were in Year 11 was used as a proxy for age that exams were taken).

**Table B: Summary of early-life (maternal and family) variables before and after multiple imputation**

| Variables with missing data in study sample <sup>1</sup> | % missing | Categories <sup>2</sup>     | Study sample [N=9545]                                          |                  |
|----------------------------------------------------------|-----------|-----------------------------|----------------------------------------------------------------|------------------|
|                                                          |           |                             | Before imputation [N specified for each variable individually] | Imputed [N=9545] |
| <b>Variables reported by mother during pregnancy</b>     |           |                             |                                                                |                  |
| Relationship status                                      | 5.2       |                             | N=9048                                                         |                  |
|                                                          |           | Married (%)                 | 75.7 (74.8-76.6)                                               | 74.7 (73.8-75.6) |
|                                                          |           | Resident partner (%)        | 16.1 (15.3-16.8)                                               | 16.5 (15.8-17.3) |
|                                                          |           | Non-resident/no partner (%) | 8.2 (7.7-8.8)                                                  | 8.7 (8.1-9.3)    |
| Highest maternal education                               | 9.7       |                             | N=8623                                                         |                  |
|                                                          |           | A Level or degree (%)       | 31.7 (30.8-32.7)                                               | 30.5 (29.5-31.4) |
|                                                          |           | O Level                     | 36.8 (35.8-37.9)                                               | 36.5 (35.5-37.5) |
|                                                          |           | Vocational/none (%)         | 31.4 (30.4-32.4)                                               | 33.0 (32.0-34.0) |
| Financial difficulties                                   | 12.1      |                             | N=8387                                                         |                  |
|                                                          |           | Q1 (none) (%)               | 34.9 (33.9-35.9)                                               | 32.7 (32.7-34.7) |
|                                                          |           | Q4 (high) (%)               | 20.4 (19.5-21.3)                                               | 21.5 (20.6-22.4) |
| Housing tenure                                           | 5.7       |                             | N=9003                                                         |                  |
|                                                          |           | Owned/mortgaged (%)         | 74.6 (73.6-75.4)                                               | 73.4 (72.5-74.3) |
| Maternal smoking                                         | 5.0       |                             | N=9068                                                         |                  |
|                                                          |           | Yes (%)                     | 26.2 (25.3-27.1)                                               | 26.9 (26.0-27.8) |
|                                                          | 13.1      |                             | N=8294                                                         |                  |
| Depression score                                         |           | Highest quartile (%)        | 22.7 (21.8-23.6)                                               | 23.5 (22.6-24.4) |
| Low social support                                       | 16.8      |                             | N=7942                                                         |                  |
|                                                          |           | Yes (%)                     | 9.3 (8.7-10.0)                                                 | 10.5 (9.7-11.2)  |
| <b>Educational attainment from NPD</b>                   |           |                             |                                                                |                  |
| Capped percentage point score <sup>3</sup>               | 0.9       | Mean                        | 68.8 (68.4-69.2)                                               | 68.5 (68.1-68.9) |

<sup>1</sup> The following variables had no missing data in study sample: child age, sex, maternal age at delivery, attainment of 5+ good GCSEs, persistent absence, SEN status, school attended.

<sup>2</sup> For brevity, not all categories are presented for each variable.

<sup>3</sup> The binary attainment variable (5+ good GCSEs) was complete for all those with a KS4 NPD record, but a small number (n=82) had missing capped point score data.



1  
2  
3  
4  
5  
6  
7  
8  
9  
10  
11  
12  
13  
14  
15  
16  
17  
18  
19  
20  
21  
22  
23  
24  
25  
26  
27  
28  
29  
30  
31  
32  
33  
34  
35  
36  
37  
38  
39  
40  
41  
42  
43  
44  
45  
46  
47

**Table C: Summary of CIN data for ALSPAC participants linked to a post-2008 CIN record (but no CLA record)**

| Variable                              |                                              | CIN (no CLA) record<br>N=209 |
|---------------------------------------|----------------------------------------------|------------------------------|
| Age (yrs) at referral date            | Median (range)                               | 16.7 (2.5-18.1)              |
| Primary need status                   | Abuse or neglect (% , 95% CI)                | 22.0 (16.9-28.2)             |
|                                       | Child disability/illness (% , 95% CI)        | 23.4 (18.2-29.7)             |
|                                       | Parental illness/disability (% , 95% CI)     | [n<5]                        |
|                                       | Family in acute stress (% , 95% CI)          | 21.5 (16.4-27.7)             |
|                                       | Family dysfunction (% , 95% CI)              | 18.2 (13.5-24.1)             |
|                                       | Socially unacceptable behaviour (% , 95% CI) | [n<5]                        |
|                                       | Low income (% , 95% CI)                      | [n<5]                        |
|                                       | Absent parenting (% , 95% CI)                | [n<5]                        |
|                                       | Cases other than CIN (% , 95% CI)            | [n<5]                        |
|                                       | Not stated (% , 95% CI)                      | 10.0 (6.6-15.0)              |
| Child ever coded as having disability | Yes (% , 95% CI)                             | 22.0 (16.9-28.2)             |

**Table D: Summary of care data for ALSPAC participants linked to a post-2005 CLA record**

| Variable                                                                 |                                                              | Linked to CLA record |                                                       |                                                          |
|--------------------------------------------------------------------------|--------------------------------------------------------------|----------------------|-------------------------------------------------------|----------------------------------------------------------|
|                                                                          |                                                              | Overall<br>n=137     | Eligible for one-third<br>sample <sup>1</sup><br>n=47 | Ineligible for one-<br>third sample <sup>2</sup><br>n=90 |
| Total number of periods of care <sup>3</sup>                             | Median, range                                                | 1 (1-13)             | 1 (1-8)                                               | 1 (1-13)                                                 |
| Total number of episodes of care <sup>3</sup>                            | Median, range                                                | 3 (1-28)             | 3 (1-24)                                              | 3 (1-28)                                                 |
| Age (yrs) at start of first period of care <sup>3</sup>                  | Median, range                                                | 13.2 (0-17.8)        | 11.5 (0-17.6)                                         | 13.7 (0.1-17.8)                                          |
| Age (yrs) at end of last episode of care <sup>3</sup>                    | Median, range                                                | 17.7 (13.1-18.0)     | 18.0 (13.1-18.0)                                      | 17.1 (13.2-18.0)                                         |
|                                                                          |                                                              | N=134                | N=45                                                  | N=89                                                     |
| Total duration (days) in care <sup>3,4</sup>                             | Median, range                                                | 906 (1-5736)         | 1394 (2-5498)                                         | 604 (1-5736)                                             |
| Primary need category at start of first period<br>of care <sup>3,5</sup> | Abuse or neglect (%; 95% CI)                                 | 30.7 (23.4-39.0)     | 34.4 (21.6-49.1)                                      | 28.9 (20.3-39.3)                                         |
|                                                                          | Child disability (%; 95% CI)                                 | 16.1 (10.8-23.3)     | 19.1 (10.0-33.5)                                      | 14.4 (8.5-23.5)                                          |
|                                                                          | Parental illness/disability (%; 95% CI) <sup>6</sup>         | 4.4 (2.0-9.5)        | /                                                     | /                                                        |
|                                                                          | Family in acute stress (%; 95% CI)                           | 18.2 (12.6-25.7)     | 17.0 (8.5-31.1)                                       | 18.9 (12.0-28.5)                                         |
|                                                                          | Family dysfunction (%; 95% CI)                               | 17.5 (12.0-24.9)     | 25.5 (14.8-40.4)                                      | 13.3 (7.6-22.2)                                          |
|                                                                          | Socially unacceptable behaviour (%; 95% CI) <sup>6</sup>     | 8.8 (5.0-14.9)       | /                                                     | /                                                        |
|                                                                          | Absent parenting (%; 95% CI) <sup>6</sup>                    | 4.4 (2.0-9.5)        | /                                                     | /                                                        |
| Placement type for last episode of care                                  | Foster care (%; 95% CI)                                      | 62.8 (54.3-70.5)     | 57.4 (42.6-71.1)                                      | 65.6 (55.0-74.8)                                         |
|                                                                          | Children's/residential/care home or school (%; 95% CI)       | 18.2 (12.6-25.7)     | 23.4 (13.2-38.1)                                      | 15.6 (9.3-24.8)                                          |
|                                                                          | Other (%; 95% CI)                                            | 19.0 (13.2-26.5)     | 19.1 (10.0-33.5)                                      | 18.9 (12.0-28.5)                                         |
| Reason for last episode of care ending                                   | Returned home to parents or relatives (%; 95% CI)            | 36.5 (28.8-45.0)     | 27.7 (16.5-42.6)                                      | 41.1 (31.3-51.7)                                         |
|                                                                          | Moved to independent living (%; 95% CI)                      | 16.8 (11.4-24.1)     | 19.1 (10.0-33.4)                                      | 15.6 (9.3-24.8)                                          |
|                                                                          | Residential care funded by adult social services (%; 95% CI) | 13.1 (8.3-20.0)      | 21.3 (11.6-35.8)                                      | 8.9 (4.4-17.0)                                           |
|                                                                          | Other (%; 95% CI)                                            | 32.8 (25.4-41.2)     | 31.9 (19.9-47.0)                                      | 34.4 (25.2-45.0)                                         |

<sup>1</sup>Individuals eligible for the one-third sample will have CLA records in the period 1998-2003 if they were looked-after during this time.

<sup>2</sup>No CLA data were collected from 2008-2003 for those ineligible for the one-third sample; therefore their looked-after status during this period is unknown.

<sup>3</sup>Measures relate to the data available from linkage only: these should be complete for those eligible for the one-third sample, but will not be for those in the ineligible sample who were looked-after during 1998-2003.

<sup>4</sup>The sum of the duration of all episodes of care, which may or may not have been consecutive.

<sup>5</sup>Refers to primary need at the start of the first period of care for which we have a record.

<sup>6</sup>Percentages not shown by one-third sample status for these need categories to prevent derivation of small cell counts (n<5).

**Table E: Comparison of care characteristics between ALSPAC participants with CLA records and individuals with CLA records in general population of same age (in ALSPAC area and in England).**

|                                                                       |                                                  | Born 1991 or 1992 with CLA record in England <sup>1</sup> | Born 1991 or 1992 with CLA record in ALSPAC area <sup>1,2</sup> | ALSPAC participants with CLA record |
|-----------------------------------------------------------------------|--------------------------------------------------|-----------------------------------------------------------|-----------------------------------------------------------------|-------------------------------------|
|                                                                       |                                                  | n=43938                                                   | n=713                                                           | n=137                               |
| Total number of periods of care <sup>3</sup>                          | Median, range                                    | 1 (1-516)                                                 | 1 (1-46)                                                        | 1 (1-13)                            |
| Total number of episodes of care <sup>3</sup>                         | Median, range                                    | 2 (1-517)                                                 | 2 (1-49)                                                        | 3 (1-28)                            |
| Age (yrs) at start of first period of care <sup>3</sup>               | Median, range                                    | 9.7 (0-18)                                                | 7.6 (0-18)                                                      | 13.2 (0-17.8)                       |
| Age (yrs) at end of last episode of care <sup>3</sup>                 | Median, range                                    | 15.5 (0-19.9)                                             | 14.2 (0-18.2)                                                   | 17.7 (13.1-18.0)                    |
| Last period of care ended <12yrs                                      | Yes (% , 95% CI)                                 | 35.6 (35.2-36.1)                                          | 41.9 (38.4-45.6)                                                | 0                                   |
|                                                                       |                                                  | n=43554                                                   | n=707                                                           | n=134                               |
| Total duration (days) in care <sup>3,4</sup>                          | Median, range                                    | 461 (1-6575)                                              | 427 (1-6069)                                                    | 906 (1-5736)                        |
|                                                                       |                                                  | n=30250                                                   | n=453                                                           | n=137                               |
| Primary need category at start of first period of care <sup>3,5</sup> | Abuse or neglect (% , 95% CI)                    | 35.3 (34.8-35.9)                                          | 26.3 (22.4-30.5)                                                | 30.7 (23.4-39.0)                    |
|                                                                       | Child disability (% , 95% CI)                    | 12.7 (12.4-13.1)                                          | 16.1 (13.0-19.8)                                                | 16.1 (10.8-23.3)                    |
|                                                                       | Parental illness/disability (% , 95% CI)         | 3.9 (3.7-4.1)                                             | 5.1 (3.4-7.5)                                                   | 4.4 (2.0-9.5)                       |
|                                                                       | Family in acute stress (% , 95% CI)              | 10.9 (10.5-11.2)                                          | 18.5 (15.2-22.4)                                                | 18.2 (12.6-25.7)                    |
|                                                                       | Family dysfunction (% , 95% CI)                  | 12.4 (12.0-12.8)                                          | 20.5 (17.0-24.5)                                                | 17.5 (12.0-24.9)                    |
|                                                                       | Socially unacceptable behaviour (% , 95% CI)     | 6.3 (6.1-6.6)                                             | 6.2 (4.3-8.8)                                                   | 8.8 (5.0-14.9)                      |
|                                                                       | Absent parenting (% , 95% CI)                    | 18.1 (17.7-18.6)                                          | 7.3 (5.2-10.1)                                                  | 4.4 (2.0-9.5)                       |
|                                                                       |                                                  | N=43602                                                   | N=712                                                           | N=137                               |
| Placement type for last episode of care                               | Foster care                                      | 32.8 (32.4-33.3)                                          | 42.0 (38.4-45.7)                                                | 62.8 (54.3-70.5)                    |
|                                                                       | Children's/residential/care home/school          | 14.1 (13.7-14.4)                                          | 9.4 (7.5-11.8)                                                  | 18.2 (12.6-25.7)                    |
|                                                                       | Other                                            | 53.1 (52.6-53.6)                                          | 49.0 (44.9-52.3)                                                | 19.0 (13.2-26.5)                    |
|                                                                       |                                                  | N=39,647                                                  | N=644                                                           | N=137                               |
| Reason for last episode of care ending                                | Returned home to parents or relatives            | 21.9 (21.5-22.3)                                          | 24.8 (21.7-28.3)                                                | 36.5 (28.8-45.0)                    |
|                                                                       | Moved to independent living                      | 17.7 (17.4-18.1)                                          | 14.8 (12.2-17.7)                                                | 16.8 (11.4-24.1)                    |
|                                                                       | Residential care funded by adult social services | 4.8 (4.5-5.0)                                             | 7.6 (5.8-9.9)                                                   | 13.1 (8.3-20.0)                     |

<sup>1</sup>Excludes the 137 individuals identified as being in ALSPAC

<sup>2</sup>Includes only those in the care of one of the following local authorities: City of Bristol; Bath and North East Somerset; South Gloucestershire; North Somerset.

**Table F: Educational attainment, absence, and special educational needs by care status excluding those with SEN (n=8145)**

| Outcome                        | Care status during KS4 | Model 1 <sup>1</sup><br>(Age and Sex) | Model 2 <sup>2</sup><br>(KS4 variables) | Model 3 <sup>3</sup><br>(Early-life variables) | Model 4 <sup>4</sup><br>(Fully adjusted) |
|--------------------------------|------------------------|---------------------------------------|-----------------------------------------|------------------------------------------------|------------------------------------------|
|                                |                        | OR (95% CI)                           | OR (95% CI)                             | OR (95% CI)                                    | OR (95% CI)                              |
| 5 A*-C GCSEs inc. Eng. & Maths | Not CIN or CLA         | Ref                                   | Ref                                     | Ref                                            | Ref                                      |
|                                | CIN (not CLA)          | 0.04 (0.01-0.36)                      | 0.08 (0.01-0.65)                        | 0.08 (0.01-0.66)                               | 0.11 (0.01-0.99)                         |
|                                | CLA                    | 0.26 (0.08-0.77)                      | 0.31 (0.10-0.98)                        | 0.35 (0.11-1.11)                               | 0.39 (0.12-1.31)                         |
|                                |                        |                                       |                                         |                                                |                                          |
|                                |                        | Coeff (95% CI)                        | Coeff (95% CI)                          | Coeff (95% CI)                                 | Coeff (95% CI)                           |
| Capped percentage score        | Not CIN or CLA         | Ref                                   | Ref                                     | Ref                                            | Ref                                      |
|                                | CIN (not CLA)          | -24.2 (-31.9 to -16.6)                | -10.7 (-17.7 to -3.7)                   | -18.1 (-25.2 to -11.1)                         | -8.8 (-15.4 to -2.1)                     |
|                                | CLA                    | -26.7 (-33.3 to -20.1)                | -21.1 (-27.1 to -15.1)                  | -22.7 (-28.8 to -16.6)                         | -18.6 (-24.3 to -12.9)                   |

<sup>1</sup>Adjusted for child age and sex

<sup>2</sup>Adjusted for child age and sex, plus KS4 time-point variables (persistent school absence, in receipt of free school meals, school mobility, IDACI of residential neighbourhood)

<sup>3</sup>Adjusted for child age and sex, plus early-life[maternal and SEP] variables (maternal age at delivery, education, partner status, housing tenure, financial difficulties, smoking, depression, social support)

<sup>4</sup>Adjusted for child age and sex, plus KS4 and early life variables

**Table G: Educational attainment, absence, and special educational needs by care status excluding those with a disability (n=9506)**

| Outcome                        | Care status during KS4 | Model 1 <sup>1</sup><br>(Age and Sex) | Model 2 <sup>2</sup><br>(KS4 variables) | Model 3 <sup>3</sup><br>(Early-life variables) | Model 4 <sup>4</sup><br>(Fully adjusted) |
|--------------------------------|------------------------|---------------------------------------|-----------------------------------------|------------------------------------------------|------------------------------------------|
|                                |                        | OR (95% CI)                           | OR (95% CI)                             | OR (95% CI)                                    | OR (95% CI)                              |
| 5 A*-C GCSEs inc. Eng. & Maths | Not CIN or CLA         | Ref                                   | Ref                                     | Ref                                            | Ref                                      |
|                                | CIN (not CLA)          | 0.07 (0.02-0.25)                      | 0.12 (0.03-0.43)                        | 0.12 (0.03-0.44)                               | 0.18 (0.05-0.64)                         |
|                                | CLA                    | 0.17 (0.07-0.43)                      | 0.19 (0.07-0.49)                        | 0.28 (0.11-0.74)                               | 0.29 (0.11-0.76)                         |
|                                |                        |                                       |                                         |                                                |                                          |
|                                |                        | Coeff (95% CI)                        | Coeff (95% CI)                          | Coeff (95% CI)                                 | Coeff (95% CI)                           |
| Capped percentage score        | Not CIN or CLA         | Ref                                   | Ref                                     | Ref                                            | Ref                                      |
|                                | CIN (not CLA)          | -25.7 (-31.7 to -19.7)                | -13.0 (-18.5 to -7.4)                   | -19.2 (-24.8 to -13.6)                         | -11.0 (-16.2 to -5.7)                    |
|                                | CLA                    | -28.6 (-34.3 to -23.0)                | -24.6 (-29.8 to -19.5)                  | -22.7 (-27.9 to -17.5)                         | -20.7 (-25.6 to -15.8)                   |

<sup>1</sup>Adjusted for child age and sex

<sup>2</sup>Adjusted for child age and sex, plus KS4 time-point variables (persistent school absence, in receipt of free school meals, school mobility, IDACI of residential neighbourhood)

<sup>3</sup>Adjusted for child age and sex, plus early-life[maternal and SEP] variables (maternal age at delivery, education, partner status, housing tenure, financial difficulties, smoking, depression, social support)

<sup>4</sup>Adjusted for child age and sex, plus KS4 and early life variables

Supplementary Figure 3: Partner, child and teacher questionnaire response rates by child social care status

— No CLA or CIN record  
 - - - CIN (no CLA) record  
 — CLA record

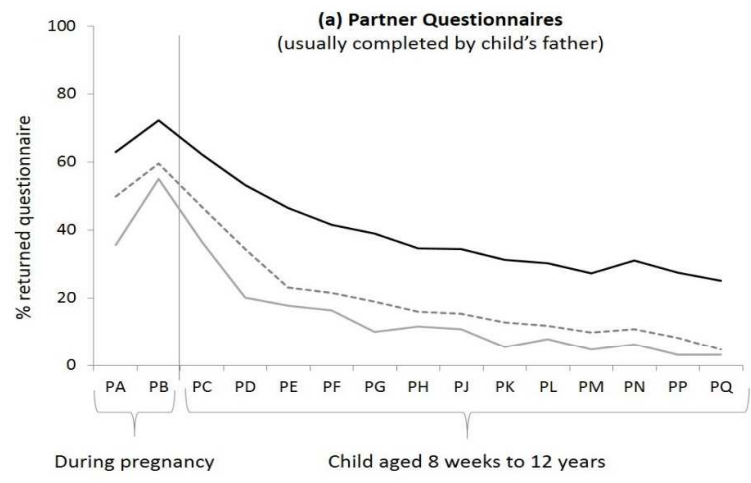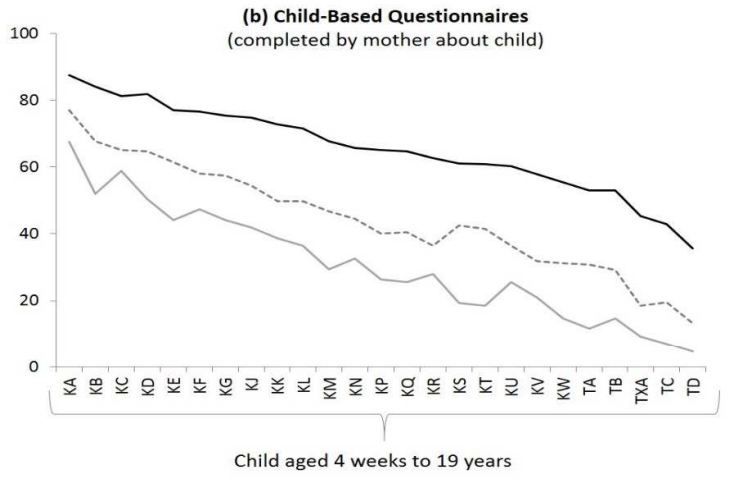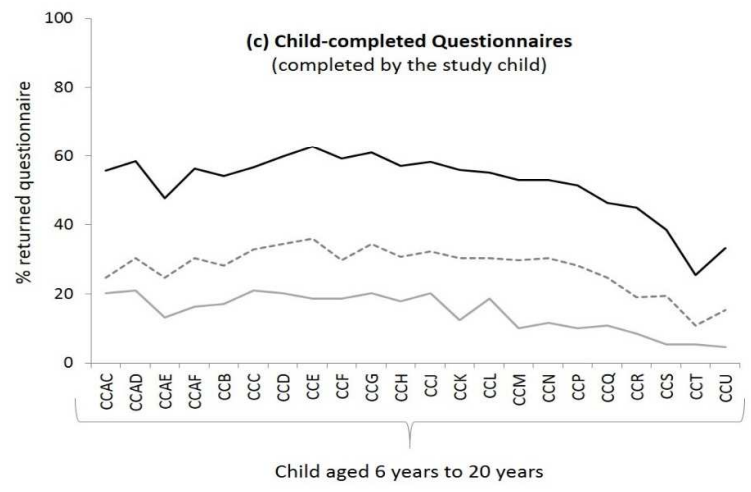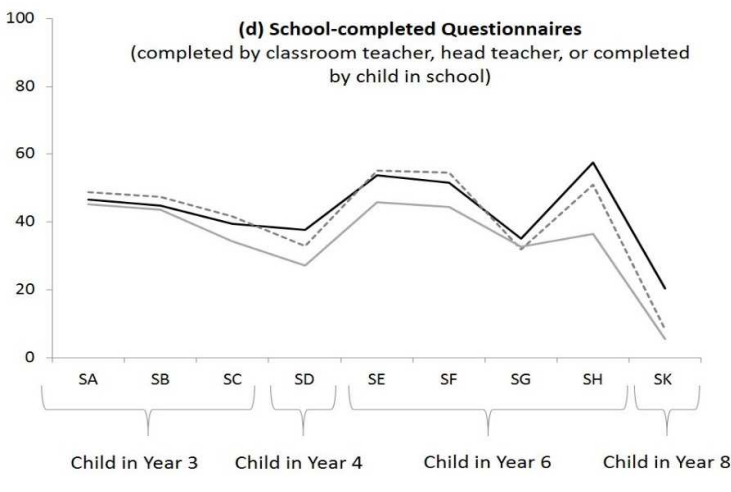

# BMJ Open

## Early-life adversity, contact with children's social care services, and educational outcomes at age 16 years: UK birth cohort study with linkage to national administrative records

|                                 |                                                                                                                                                                                                                                                                                                                                                                                                           |
|---------------------------------|-----------------------------------------------------------------------------------------------------------------------------------------------------------------------------------------------------------------------------------------------------------------------------------------------------------------------------------------------------------------------------------------------------------|
| Journal:                        | <i>BMJ Open</i>                                                                                                                                                                                                                                                                                                                                                                                           |
| Manuscript ID                   | bmjopen-2019-030213.R1                                                                                                                                                                                                                                                                                                                                                                                    |
| Article Type:                   | Original research                                                                                                                                                                                                                                                                                                                                                                                         |
| Date Submitted by the Author:   | 15-Aug-2019                                                                                                                                                                                                                                                                                                                                                                                               |
| Complete List of Authors:       | Teyhan, Alison; University of Bristol, Bristol Medical School, Population Health Sciences<br>Boyd, Andy; University of Bristol, Bristol Medical School, Population Health Sciences<br>Wijedasa, Dinithi; University of Bristol, Hadley Centre for Adoption and Foster Care Studies, School for Policy Studies<br>Macleod, John; University of Bristol, Bristol Medical School, Population Health Sciences |
| <b>Primary Subject Heading</b>: | Epidemiology                                                                                                                                                                                                                                                                                                                                                                                              |
| Secondary Subject Heading:      | Epidemiology, Research methods                                                                                                                                                                                                                                                                                                                                                                            |
| Keywords:                       | ALSPAC, record linkage, education, social care, looked-after, adolescence                                                                                                                                                                                                                                                                                                                                 |
|                                 |                                                                                                                                                                                                                                                                                                                                                                                                           |

SCHOLARONE™  
Manuscripts

1  
2  
3 **Early-life adversity, contact with children’s social care services, and**  
4 **educational outcomes at age 16 years: UK birth cohort study with**  
5 **linkage to national administrative records**  
6  
7  
8  
9

10  
11 Alison Teyhan<sup>\*a</sup>, Andy Boyd<sup>a</sup>, Dinithi Wijedasa<sup>b</sup>, John Macleod<sup>a</sup>  
12  
13

14  
15  
16  
17 \*Corresponding author

18 Email: alison.teyhan@bristol.ac.uk

19 Phone: +44 (0)117 331 0058  
20  
21  
22  
23

24  
25 <sup>a</sup> Population Health Sciences, Bristol Medical School, University of Bristol, Oakfield House,  
26

27 Oakfield Grove, Bristol, BS8 2BN, UK  
28  
29

30 <sup>b</sup> Hadley Centre for Adoption and Foster Care Studies, School for Policy Studies, University of  
31

32 Bristol, 8 Priory Road, Bristol, BS8 1TZ, UK  
33  
34  
35  
36  
37  
38  
39  
40  
41  
42  
43  
44  
45  
46  
47  
48  
49  
50  
51  
52  
53  
54  
55  
56  
57  
58  
59  
60

**ABSTRACT (248 words)**

**Objectives:** To use record linkage of birth cohort and administrative data to study educational outcomes of children who are looked-after (in public care) and in need (social services involvement), and examine the role of early life factors.

**Setting, Design:** Prospective observational study of children from the Avon Longitudinal Study of Parents and Children (ALSPAC), which recruited pregnant women in and around Bristol, UK in the early 1990s. ALSPAC was linked to the annual Children Looked-After (CLA) Data Return and Children In Need (CIN) Census. Educational outcomes at 16 years were obtained through linkage to the National Pupil Database. These included passing 5+ good GCSEs (grades A\*-C, including English and Maths). Covariates included early-life adversity and social position.

**Participants:** 9545 children from ALSPAC who had complete education and covariate data were included in the main educational outcomes analyses.

**Results:** Overall, of the 12,868 ALSPAC participants linked to NPD data, 137 had a CLA record and a further 209 a CIN record during adolescence. These children were more disadvantaged than their peers and had little active study participation beyond infancy. In the main educational outcomes analyses, achievement of 5+ good GCSEs was low in the CLA (OR 0.14, 95% CI 0.05-0.35) and CIN (0.11, 0.05-0.27) groups relative to their peers. Measured early-life factors explained little of this difference.

**Conclusions:** Data linkage enabled the study of educational outcomes in children with social services contact. These children had substantially worse educational outcomes relative to their peers, for reasons likely to be multifactorial.

**Key Words:** ALSPAC; record linkage; education; social care; looked-after; adolescence



## Article Summary - Strengths and Limitations

- We link a population-based birth cohort study (ALSPAC) to social care and educational records, and demonstrate that record linkage offers a means to identify vulnerable children in a cohort and increase their inclusion in research.
- The children in ALSPAC who had been looked-after (in public care) were broadly representative in terms of their care characteristics of children nationally of the same age who had been looked-after.
- We were only able to identify children who had been in care or in need during adolescence.
- Cohort data availability for children with social care records in adolescence was low beyond infancy.

## INTRODUCTION

Children with social services contact, including those in public care, are at higher risk of poor outcomes than their peers, including low educational attainment, substance abuse, and mental illness(1-10). The extent to which this reflects early-life adversity prior to contact with services as opposed to later influences is unclear. Outcomes mainly resulting from early adversity may be less amenable to change through social care interventions, requiring alternative prevention strategies. These children are challenging to study using traditional research methods. A recent Children's Commissioner for England report highlights that vulnerable children are 'absent or poorly measured in national studies'(11), and children's social care is a difficult area in which to conduct randomised controlled trials(12). Further, those who experience extreme adversity are likely under-represented in birth cohort studies due to low recruitment and high attrition, and identification of vulnerable children is challenging due to reliance on parental-report.

Children with social services contact in England do however have high levels of administrative data. The term 'in need' refers to children who have been referred to and assessed by social services and found to be 'unlikely to achieve or maintain a reasonable level of health or development, or whose health and development is likely to be significantly or further impaired, without the provision of services; or a child who is disabled'(13). Almost 390,000 children are currently classified as 'in need'(14). Some children in need may enter the public care system and become a 'looked-after' child. Presently over 72,000 children are looked-after(15), with the majority placed with foster carers(1).

While routine statistics using social care data can highlight poor outcomes, e.g. low average educational attainment, they lack information on early-life and family characteristics(1, 16, 17). These types of data are readily available in birth cohort studies. Linking cohort data to

1  
2  
3 social care records could therefore provide a means of identifying children in need and  
4  
5 looked-after without reliance on parental-report. Further, using additional linked data to  
6  
7 measure outcomes potentially enables the child's inclusion in analyses even if their family  
8  
9 have stopped actively participating in the cohort study.  
10  
11

12  
13 We use record linkage to a birth cohort to examine the effect of being in need or looked-after  
14  
15 in adolescence on educational outcomes at age 16 years: the low attainment of many in need  
16  
17 and looked-after children at this age is a concern as it can compound their disadvantaged  
18  
19 childhoods to limit future education, employment, and general life chances(18).  
20  
21

## 22 23 **METHODS**

### 24 25 **Data**

#### 26 27 *Avon Longitudinal Study of Parents and Children (ALSPAC)*

28  
29 Pregnant women living in and around the city of Bristol, UK with expected date of delivery  
30  
31 April 1991 to December 1992 were eligible to participate in ALSPAC. There were 14,541  
32  
33 pregnancies enrolled, resulting in 13,988 children alive at one year, including 13,972  
34  
35 singletons and twins. This 'core sample' was later bolstered by further eligible children: an  
36  
37 additional 713 from age 7-18yrs, and to date 183 since age 18yrs. The mothers, their partners,  
38  
39 and the study children are studied via questionnaires and clinic visits. Teachers also  
40  
41 completed questionnaires on the children. Further details are provided in cohort profiles(19,  
42  
43 20) and searchable data-dictionary(21). For the main analyses on educational outcomes, the  
44  
45 sample was restricted to: core, one child per family, with education data (n=9545, Figure 1).  
46  
47  
48  
49  
50  
51

52  
53 Ethical approval for ALSPAC was obtained from the ALSPAC Ethics and Law Committee  
54  
55 and Local Research Ethics Committees ([www.bristol.ac.uk/alspac/researchers/research-ethics/](http://www.bristol.ac.uk/alspac/researchers/research-ethics/)). When study children reached age 18, they were sent 'fair processing' materials  
56  
57  
58  
59  
60

1  
2  
3 which described ALSPAC's intended use of their health and administrative records, and gave  
4 a clear means to object(22). Education data were not extracted for participants who objected,  
5  
6 or who were not sent fair processing materials.  
7  
8  
9

### 10 *Linkage data*

11  
12  
13 Data on children who are looked-after, or have been referred as a child in need, are collected  
14 annually via the Children Looked-After (CLA) Data Return(23) and the Children in Need  
15 (CIN) Census(24). The CIN Census covers all children referred to children's social services  
16 even if no further action is taken. The CLA Return and the CIN Census have been linked to  
17 the National Pupil Database (NPD), a repository of education data for schools in England(25),  
18 since their 2005/06 and 2008/09 data collections respectively. ALSPAC has an established  
19 link to the NPD, and thus to any post-2005 CLA or post-2008 CIN record for participants in  
20 the NPD. Earlier CLA records were also obtained for those with a post-2005 record.  
21  
22 However, CLA data collection was only on a random one-third sample of looked-after  
23 children from 1998-2003, meaning no records exist for many looked-after children in this  
24 period(23). Insufficient identifiers exist within the CLA dataset to enable linkage of  
25 ALSPAC to pre-2005 CLA records for those without a post-2005 record.  
26  
27  
28  
29  
30  
31  
32  
33  
34  
35  
36  
37  
38  
39  
40  
41

42 We also obtained CLA records for all individuals in the CLA Return of a similar age (born  
43 January 1991-December 1992) to form two comparison groups: (1) ever looked-after in  
44 England (n=43,938); (2) ever looked-after in the four local authorities that approximate the  
45 ALSPAC recruitment area (Bristol City; South Gloucestershire; North Somerset; Bath and  
46 North East Somerset) (n=713).  
47  
48  
49  
50  
51  
52  
53

## 54 **Measures**

### 55 *Educational outcomes*

56  
57  
58  
59  
60

1  
2  
3 Pupils in England study General Certificate of Education (GCSE) courses during Key Stage 4  
4 (KS4) of their education (Years 10 and 11, aged 14-16yrs) and take GCSE exams at the end  
5  
6 of Year 11. The oldest ALSPAC children sat their GCSE exams in 2007, the youngest in  
7  
8 2009. Our main outcomes were two measures of attainment. First, a binary measure:  
9  
10 achievement of 5+ good GCSEs (grades A\*-C, including English and Maths). Second, a  
11  
12 continuous measure: capped point score, expressed as a percentage of the maximum possible  
13  
14 capped point score (based on the eight best grades obtained, with each grade assigned a  
15  
16 numerical value)(26). Secondary educational outcomes included: persistent absence ( $\geq 10\%$   
17  
18 of half days); special educational needs (SEN) status (see Supplementary Text for definitions  
19  
20 of the different SEN categories); and school mobility (whether child joined school during  
21  
22 KS4).  
23  
24  
25  
26  
27  
28

### 29 *Contact with children's social care services*

30  
31  
32 Contact with children's social care services (referred to as 'social care status' hereafter) was  
33  
34 summarised in two variables. The first specified whether a child had any post-2005 CLA  
35  
36 record(s) or post-2008 CIN record(s) (i.e. was looked-after or referred to social care services  
37  
38 at any time for which we have linked social care data). The second summarised social care  
39  
40 status during KS4 only. This restriction was necessary for the educational outcomes analyses  
41  
42 to ensure our exposure preceded our outcome, plus these are the only two school years with  
43  
44 CLA data coverage for all children in our sample (Supplementary Table A). By definition  
45  
46 children who are looked-after are also in need but we use 'in need' to refer to children with a  
47  
48 CIN but not a CLA record. The reference group comprised children with a KS4 record in the  
49  
50 NPD who had no linked social care record.  
51  
52  
53

54  
55 Variables related to being in care or in need were derived from the linked data as follows.

56  
57 CIN Census: category of need; age referred. CLA Return: category of need; age first period of  
58  
59  
60

1  
2  
3 care (POC) started (POC is a period of time when child is continuously looked-after by the  
4 local authority); number of POC and episodes of care (a POC is comprised of ‘episodes’, each  
5 representing a period of being looked-after under the same legal status and in the same  
6 placement); placement type (foster; children’s home/residential home/residential school; other  
7 [no further disaggregation possible due to small numbers]).  
8  
9  
10  
11  
12  
13

### 14 15 *Covariates*

16  
17  
18 These included child age and sex, plus measures related to family socio-economic position  
19 (SEP). Early-life exposures included maternal age at delivery, and measures reported by the  
20 mother during pregnancy: highest educational qualification; financial difficulties; housing  
21 tenure; partner status; smoking; alcohol intake; social support; and depressive symptoms(27).  
22  
23 Later measures of SEP (during KS4) were obtained from the NPD: receipt of free school  
24 meals (FSM)(28); and child’s residential neighbourhood deprivation measured by the Income  
25 Deprivation Affecting Children Index (IDACI)(29). More details in Supplementary Text.  
26  
27  
28  
29  
30  
31  
32  
33  
34

### 35 **Statistical analyses**

36  
37  
38 Descriptive statistics were used to: summarise the social care data linked to ALSPAC  
39 children; compare the ALSPAC looked-after sample to the two non-ALSPAC looked-after  
40 comparison groups; compare child, maternal and SEP characteristics by social care status;  
41 describe questionnaire completion rates by social care status.  
42  
43  
44  
45  
46  
47

48 Associations between social care status and educational outcomes were examined using  
49 multilevel regression models (individual level 1, school level 2). Linear models were used for  
50 capped point score, logistic for attainment of 5+ good GCSEs. Associations were adjusted for  
51 age and sex (Model 1), then also for KS4 measures [FSM, neighbourhood deprivation, school  
52 mobility] (Model 2), or for early-life exposures (Model 3). We then adjusted for all KS4 and  
53 early-life variables (Model 4). Multiple imputation using chained equations was used to  
54  
55  
56  
57  
58  
59  
60

1  
2  
3 impute missing data (supplementary Table B) for the educational outcomes analyses sample  
4  
5 (n=9545). 100 datasets were imputed.  
6  
7

8 In sensitivity analyses, models were restricted to children with no SEN (n=8145) or no  
9  
10 disability (n=9506). Social care status at any time was also considered. Finally, we described  
11  
12 associations between social care characteristics (e.g. placement type, reason for being in need)  
13  
14 and capped point score in those with CIN or CLA records: to maximise sample size, we  
15  
16 included all those who had these records at any time and who had capped point score data.  
17  
18  
19

### 20 **Patient and Public Involvement**

21  
22  
23 Patients, the public, and study participants were not directly involved in this study. Some  
24  
25 ALSPAC participants are members of a committee which meets bi-monthly to provide  
26  
27 insights and advice on general ALSPAC study design, methodology and acceptability for  
28  
29 participants.  
30  
31  
32  
33  
34  
35

## 36 **RESULTS**

### 37 **Children in ALSPAC with social care records**

38  
39  
40 Of those with a post-2008 CIN (but no CLA) record (n=209) the most common needs at  
41  
42 referral were child disability, abuse or neglect, and family in acute stress. Of those with a  
43  
44 post-2005 CLA record (n=137), the most common primary need was abuse or neglect  
45  
46 (Supplementary Tables C and D). Median total time in care was 2.6 years. Foster care was  
47  
48 the most common placement type.  
49  
50  
51  
52  
53

### 54 **Comparison to non-ALSPAC looked-after children**

55  
56  
57 The ALSPAC children with CLA records were generally similar to those of children born at  
58  
59 the same time who were ever in care in England (comparison group 1) or in the area in and  
60

1  
2  
3 around Bristol (comparison group 2) in terms of primary need (Supplementary Table E).  
4  
5 Importantly, many of those who had ever had a CLA record in the two comparison groups  
6  
7 (36% of group 1; 42% of group 2) had left care before the age of 12 (the youngest age at  
8  
9 which we were able to link CLA records to ALSPAC).  
10  
11  
12

### 13 **Availability of cohort data**

14  
15  
16 Maternal questionnaire response rates were highest for participants with no social care record  
17  
18 and lowest for those with a CLA record at all time points. Differences generally widened  
19  
20 over time (Figure 2). Patterns were similar for partner and child, but not teacher,  
21  
22 questionnaires (supplementary Figures 1a-d).  
23  
24  
25

### 26 **Educational outcomes at 16 years**

27  
28  
29 Of the 9545 children in these analyses, 49 had CLA and 64 CIN (no CLA) records during  
30  
31 KS4. These groups were more disadvantaged than their peers in early-life and during KS4  
32  
33 (Table 1). They were more likely to have joined their school recently.  
34  
35

36  
37 Of those with CIN or CLA records, <15% passed 5+ good GCSEs compared to >50% of their  
38  
39 peers. Mean percentage scores were also markedly lower (Table 2). They were more likely  
40  
41 to have SEN and persistent absence rates were higher, particularly for the in need group.  
42

43  
44 Adjustment for school absence, neighbourhood deprivation, and receipt of FSM attenuated  
45  
46 associations slightly for the CIN group but had less of an impact for the CLA group (Table 3).  
47

48  
49 Adjustment for early-life maternal and SEP factors had more of an attenuating effect for the  
50  
51 CLA than the CIN group. Attainment differences between these groups and their peers  
52  
53 remained in the fully adjusted model.  
54

55  
56 In sensitivity analyses, when social care records at any time were considered, patterns were  
57  
58 similar for the CLA group (n=76), while the CIN group (n=148) tended to do better than  
59  
60 when restricted to only those who were in need during KS4 (Table 2). When the sample



1  
2  
3 excluded those with SEN or disability, results were similar to those of the main analyses  
4  
5 (supplementary tables F and G).  
6  
7

8 Estimates of the relationship between social care characteristics and attainment were  
9  
10 imprecise due to small numbers. Those in foster placements had higher capped percentage  
11  
12 scores (mean 37.0, 95% CI 30.7 to 43.2, n=64) than those in children's/residential  
13  
14 homes/residential schools (28.3, 14.7 to 42.0, n=12). With regards need status, 'child  
15  
16 disability' was associated with the lowest attainment for the CIN group and 'socially  
17  
18 unacceptable behaviour' for the CLA group. For both CLA and CIN groups, those in the  
19  
20 'parental illness/disability' category had the highest attainment. However confidence  
21  
22 intervals were wide and overlapping.  
23  
24  
25  
26  
27  
28  
29  
30  
31  
32  
33  
34  
35  
36  
37  
38  
39  
40  
41  
42  
43  
44  
45  
46  
47  
48  
49  
50  
51  
52  
53  
54  
55  
56  
57  
58  
59  
60

**Table 1: Summary of maternal, family and child characteristics, by social care status of child during Key Stage 4**

|                                                                               |                         | Child's social care status during KS4 |                             |                    |
|-------------------------------------------------------------------------------|-------------------------|---------------------------------------|-----------------------------|--------------------|
|                                                                               |                         | No CLA/CIN record<br>n=9432           | CIN (no CLA) record<br>n=64 | CLA record<br>n=49 |
| <b>Maternal and family characteristics during pregnancy<sup>1</sup></b>       |                         | % (95% CI)                            |                             |                    |
| Maternal age (at delivery)                                                    | <=23 years              | 18.4 (17.7-19.2)                      | 39.1 (27.0-51.4)            | 28.6 (15.4-41.7)   |
|                                                                               | >33 years               | 12.3 (11.6-12.9)                      | 7.8 (1.1-14.6)              | 14.3 (4.1-24.5)    |
| Relationship status                                                           | Married                 | 75.0 (74.1-75.9)                      | 53.8 (40.8-66.7)            | 49.5 (34.3-64.8)   |
|                                                                               | Resident partner        | 16.5 (15.7-17.3)                      | 17.0 (6.9-27.1)             | 27.4 (13.5-41.3)   |
|                                                                               | Non-resident/no partner | 8.5 (7.9-9.1)                         | 29.2 (17.3-41.2)            | 23.1 (9.9-36.3)    |
| Highest maternal education                                                    | A Level or degree       | 30.7 (29.8-31.7)                      | 10.8 (2.3-19.3)             | 11.1 (0.9-21.4)    |
|                                                                               | O Level                 | 36.5 (35.5-37.5)                      | 40.7 (27.2-54.1)            | 26.3 (12.1-40.6)   |
|                                                                               | Vocational/none         | 32.8 (31.8-33.8)                      | 48.5 (34.6-62.5)            | 62.5 (47.2-77.9)   |
| Financial difficulties                                                        | Highest quartile        | 21.2 (20.3-22.1)                      | 42.2 (27.6-56.8)            | 46.8 (30.4-63.2)   |
| Housing tenure                                                                | Owned/mortgaged         | 73.7 (72.8-74.7)                      | 54.3 (41.4-67.3)            | 33.7 (19.2-48.2)   |
| Maternal smoking                                                              | Yes                     | 26.6 (25.7-27.6)                      | 41.3 (28.2-54.3)            | 58.6 (42.3-75.0)   |
| Maternal alcohol - first trimester, ≥1 unit per week                          | Yes                     | 15.2 (14.4-15.9)                      | 17.8 (7.6-28.0)             | 21.7 (8.0-35.3)    |
| Maternal alcohol - 2 <sup>nd</sup> trimester, ever ≥4 units in one day        | Yes                     | 16.9 (16.1-17.6)                      | 26.7 (14.8-38.5)            | 21.1 (7.6-34.6)    |
| Depression score                                                              | Highest quartile        | 23.4 (22.5-24.3)                      | 29.4 (16.4-42.4)            | 47.8 (31.5-64.1)   |
| Low social support                                                            | Yes                     | 10.3 (9.6-11.0)                       | 20.8 (8.7-32.8)             | 25.9 (10.6-41.2)   |
| <b>Child, school and neighbourhood characteristics during KS4<sup>1</sup></b> |                         | % or mean (95% CI)                    |                             |                    |
| Sex                                                                           | Female                  | 49.6 (48.6-50.6)                      | 51.6 (39.0-64.2)            | 49.0 (34.5-63.5)   |
| Age at start of Year 11                                                       | Mean (years)            | 15.5 (15.4-15.5)                      | 15.5 (15.4-15.6)            | 15.5 (15.4-15.5)   |
| In receipt of free school meals                                               | Yes                     | 6.1 (5.6-6.6)                         | 26.6 (15.4-37.7)            | 10.2 (1.4-19.0)    |
| Joined school during KS4                                                      | Yes                     | 1.4 (1.1-1.6)                         | 7.8 (1.1-14.6)              | 12.2 (2.7-21.8)    |
| Neighbourhood deprivation (IDACI)                                             | Low, <10%               | 43.9 (42.9-44.9)                      | 20.3 (10.2-30.4)            | 28.6 (15.4-41.7)   |
|                                                                               | High, ≥40%              | 10.1 (9.5-10.7)                       | 25.0 (14.1-35.9)            | 20.4 (8.7-32.1)    |

<sup>1</sup> For brevity, not all categories are presented for each categorical variable.

**Table 2: Educational attainment, persistent absence, and special educational needs by child social care status**

|                                                     | Social care status during KS4 |                             |                    | Social care status any time |                              |                    |
|-----------------------------------------------------|-------------------------------|-----------------------------|--------------------|-----------------------------|------------------------------|--------------------|
|                                                     | No CLA/CIN record<br>n=9432   | CIN (no CLA) record<br>n=64 | CLA record<br>n=49 | No CLA/CIN record<br>n=9321 | CIN (no CLA) record<br>n=148 | CLA record<br>n=76 |
| <b>Educational Attainment</b>                       | % or mean (95% CI)            |                             |                    | % or mean (95% CI)          |                              |                    |
| 5+ A*-C GCSEs including English & Maths             | 53.0 (52.0-54.0)              | 10.9 (3.1-18.8)             | 12.2 (2.7-21.8)    | 53.3 (52.3-54.4)            | 19.6 (13.1-26.1)             | 10.5 (3.5-17.6)    |
| Capped percentage point score                       | 68.9 (68.5-69.3)              | 37.4 (31.3-43.5)            | 34.9 (27.4-42.3)   | 69.1 (68.7-69.5)            | 47.7 (43.8-51.7)             | 33.9 (28.2-39.6)   |
| <b>Special Educational Needs (SEN)</b> <sup>1</sup> |                               |                             |                    |                             |                              |                    |
| School action                                       | 8.5 (7.9-9.1)                 | 12.5 (4.2-20.8)             | n<5                | 8.4 (7.8-9.0)               | 16.2 (10.2-22.2)             | 9.2 (2.6-15.9)     |
| School action plus                                  | 3.1 (2.8-3.5)                 | 15.6 (6.5-24.8)             | 24.5 (12.0-37.0)   | 3.1 (2.7-3.4)               | 8.1 (3.7-12.6)               | 21.1 (11.7-30.4)   |
| Statement of Special Educational Needs              | 2.4 (2.1-2.7)                 | 46.9 (34.3-59.4)            | 24.5 (12.0-37.0)   | 2.3 (2.0-2.6)               | 22.3 (15.5-29.1)             | 35.5 (24.5-46.5)   |
| <b>Persistent absence</b>                           | 6.8 (6.3-7.3)                 | 32.8 (21.0-44.6)            | 18.4 (7.1-29.6)    | 6.7 (6.2-7.2)               | 19.6 (13.1-26.1)             | 21.1 (11.7-30.4)   |

<sup>1</sup>For definitions of these SEN categories, please see Supplementary Text.

**Table 3: Association between child social care status and educational outcomes, with adjustment for early-life and KS4 variables**

| Attainment Outcome                      | Care status during KS4 | Model 1 <sup>1</sup>         | Model 2 <sup>2</sup>           | Model 3 <sup>3</sup>                  | Model 4 <sup>4</sup>            |
|-----------------------------------------|------------------------|------------------------------|--------------------------------|---------------------------------------|---------------------------------|
|                                         |                        | (Age and Sex)<br>OR (95% CI) | (KS4 variables)<br>OR (95% CI) | (Early-life variables)<br>OR (95% CI) | (Fully adjusted)<br>OR (95% CI) |
| 5+ A*-C GCSEs including English & Maths | Not CIN or CLA         | Ref                          | Ref                            | Ref                                   | Ref                             |
|                                         | CIN (not CLA)          | 0.11 (0.05-0.27)             | 0.17 (0.07-0.40)               | 0.15 (0.06 to 0.36)                   | 0.19 (0.08-0.46)                |
|                                         | CLA                    | 0.14 (0.05-0.35)             | 0.14 (0.06-0.36)               | 0.25 (0.10 to 0.63)                   | 0.24 (0.09-0.63)                |
|                                         |                        | Coeff (95% CI)               | Coeff (95% CI)                 | Coeff (95% CI)                        | Coeff (95% CI)                  |
| Capped percentage point score           | Not CIN or CLA         | Ref                          | Ref                            | Ref                                   | Ref                             |
|                                         | CIN (not CLA)          | -22.1 (-26.7 to -17.5)       | -14.1 (-18.4 to -9.8)          | -18.4 (-22.6 to -14.1)                | -13.1 (-17.1 to -9.0)           |
|                                         | CLA                    | -28.4 (-33.5 to -23.3)       | -25.0 (-29.7 to -20.3)         | -21.9 (-26.6 to -17.2)                | -20.6 (-25.0 to -16.1)          |

<sup>1</sup>Adjusted for child age and sex

<sup>2</sup>Adjusted for child age and sex, plus KS4 time-point variables (persistent school absence, in receipt of free school meals, school mobility, IDACI of residential neighbourhood)

<sup>3</sup>Adjusted for child age and sex, plus early-life [maternal and SEP] variables (maternal age at delivery, education, partner status, housing tenure, financial difficulties, smoking, alcohol, depression, social support)

<sup>4</sup>Adjusted for child age and sex, plus KS4 and early life variables

## DISCUSSION

Children who were looked-after or in need during KS4 had low attainment at age 16. The early-life exposures we considered were not a major explanatory factor. We believe this is the first time linkage to the CLA Return and CIN Census has been used to identify birth cohort participants who were looked-after or in need during adolescence. As linkage data were also used for outcome measures, participants could be included even if their families no longer actively participated in the cohort study. Record linkage therefore allowed vulnerable children to not only be included in research but to be the focus of it. However, the identification and inclusion of in need and looked-after children in research using record linkage does have challenges.

For cohort studies in England with relevant permissions, linkage to the CLA Return and CIN Census via the NPD offers a convenient means of identifying participants who have been in need or looked-after. For cohorts younger than ALSPAC, this method would allow identification of social care records that cover most, if not all, of participants' childhoods. However, in ALSPAC we were only able to link to records covering a period during adolescence. Consequently, outcomes at younger ages cannot be examined by social care status in ALSPAC using this method. Of the looked-after children in England the same age as the ALSPAC participants, we found around 40% had left the care system by the age of 12. Consequently, our reference group likely includes children who were looked-after or in need at younger ages only.

Examination of questionnaire response rates showed the value of using linked outcome data to increase the inclusion of vulnerable children in research: there was little questionnaire data available beyond infancy for participants with social care records in adolescence. In this current study, we examined educational outcomes at age 16, obtained from the NPD. The

1  
2  
3 association between social care status and other later outcomes available from linked data  
4  
5 could also be investigated using ALSPAC, such as mental illness or entry into higher  
6  
7 education.  
8  
9

10  
11 ALSPAC participants with CLA and CIN records in adolescence had lower educational  
12  
13 attainment than their peers in the reference group. In the most recent national data available,  
14  
15 attainment patterns by social care status broadly reflect these findings(1). We found  
16  
17 persistent absence rates to be considerably lower for those looked-after than those in need  
18  
19 during KS4. Similarly, in the national data (on pupils of all ages) 9% of looked-after children  
20  
21 were persistent absentees and 28% of children in need(1). Therefore, although our  
22  
23 participants were in KS4 around 10 years ago and the number with social care records small,  
24  
25 the patterning of educational characteristics by care status is broadly similar to the present-  
26  
27 day situation.  
28  
29

30  
31  
32 Using both ALSPAC questionnaire data and measures from the NPD, we found a persistence  
33  
34 of disadvantage from early-life to adolescence for participants with CIN and CLA records.  
35  
36 Social disadvantage is known to be strongly associated with poorer educational  
37  
38 attainment(30, 31), and our SEP measures were strongly related to the educational outcomes.  
39  
40 Adjustment for them attenuated associations slightly but the low attainment of the CLA and  
41  
42 CIN groups remained. We are not considering the SEP measures as confounders but rather  
43  
44 part of the complex causal pathway from early-life adversity through to poor educational  
45  
46 attainment. It is notable that many of the mothers of the children with social care records had  
47  
48 very low educational attainment themselves.  
49  
50  
51

52  
53 Alcohol and tobacco, the most commonly used substances in pregnancy, can cross the  
54  
55 placenta and alter normal brain development (32). In our sample, those with social care  
56  
57 records had higher levels of exposure to these substances than their peers. Those with CIN  
58  
59  
60

1  
2  
3 records were the most likely to have ever been exposed to  $\geq 4$  units of alcohol in one day.

4  
5 Exposure to this level of alcohol has previously been found to be negatively associated with  
6  
7 educational attainment in the ALSPAC sample (33, 34). However, in our analyses,  
8  
9 adjustment for maternal alcohol use did not alter the associations observed between social  
10  
11 care status and educational attainment. This may be due in part to our binary alcohol  
12  
13 measures (necessary due to small numbers) failing to accurately capture exposure, and not  
14  
15 identifying those at highest risk. This is an important limitation as many children in the care  
16  
17 system have foetal alcohol syndrome, a condition which is often undiagnosed and is the most  
18  
19 common, non-genetic cause of learning disability in the UK (35, 36). The majority of  
20  
21 participants with CLA records had a mother who smoked during pregnancy, and this  
22  
23 exposure was negatively associated with attainment. However there is debate as to whether  
24  
25 maternal smoking during pregnancy is a direct cause of poorer child educational attainment,  
26  
27 or is instead a strong marker of socio-economic disadvantage (37-39).  
28  
29  
30  
31  
32

33  
34 Overall, little of the poor educational outcomes in the looked-after and in need groups  
35  
36 appeared to be explained by the early-life exposures we considered. This could suggest there  
37  
38 is scope for later experiences, including social care, to improve outcomes. However, other  
39  
40 early-life exposures, or genetic factors, that we have not considered could be of importance.  
41  
42

43  
44 While aspects of care itself could be important contributors to educational outcomes,  
45  
46 ascertaining direction of causality in the relationship between child behaviours, care  
47  
48 characteristics, and educational outcomes is difficult. As expected, we found children in  
49  
50 foster care had higher attainment than those not in family-based care: the latter children are  
51  
52 likely to be those whose foster placements have broken down, reflecting complex additional  
53  
54 needs and challenging behaviours. Further, foster carers may have greater commitment and  
55  
56 longer-term interest in the child than group care staff(40). We were unable to consider  
57  
58 placement stability, which has previously been shown to be beneficial(41). However, in  
59  
60

1  
2  
3 concordance with previous studies, school mobility was associated with lower attainment(42,  
4 43) and children with CLA or CIN records were much more likely to have changed school  
5 during KS4 than their peers.  
6  
7  
8  
9

10 The relatively high proportion of looked-after and in need children with SEN or disability did  
11 not appear to explain the low average attainment of these groups. Similarly, in the national  
12 data looked-after children with no identified SEN made less educational progress than non-  
13 looked-after children(1). It is important to note that the attainment gap between looked-after  
14 and in need children and their peers is apparent from a young age, often before the child  
15 enters care(1, 41). Being looked-after may not be the principal cause of poor attainment,  
16 rather it is a marker of extreme childhood adversity, which is itself associated with poor  
17 outcomes. Being in care is often beneficial for a child's education(17, 18, 41).  
18  
19  
20  
21  
22  
23  
24  
25  
26  
27  
28  
29

30 Strengths of this study include the use of a novel method to identify vulnerable adolescents in  
31 a population-based cohort, and objective outcome measures. Limitations include incomplete  
32 ascertainment of social care record status, little cohort data beyond early childhood for those  
33 with social care records, and small numbers. Children who experience the most  
34 disadvantaged starts in life are likely under-represented in ALSPAC as their mothers would  
35 have been least likely to attend antenatal appointments, which is where many mothers were  
36 recruited to the study.  
37  
38  
39  
40  
41  
42  
43  
44  
45  
46

## 47 **Conclusions**

48  
49 Data linkage provides a means of identifying children with social services contact in cohort  
50 studies and of increasing their inclusion in research. The poor educational outcomes of the  
51 ALSPAC adolescents with social care records did not appear to be substantially explained by  
52 the early-life exposures we considered. Further research, ideally with social care data across  
53 the lifecourse, would help identify which factors are important in explaining the poor  
54  
55  
56  
57  
58  
59  
60



1  
2  
3  
4  
5  
6  
7  
8  
9  
10  
11  
12  
13  
14  
15  
16  
17  
18  
19  
20  
21  
22  
23  
24  
25  
26  
27  
28  
29  
30  
31  
32  
33  
34  
35  
36  
37  
38  
39  
40  
41  
42  
43  
44  
45  
46  
47  
48  
49  
50  
51  
52  
53  
54  
55  
56  
57  
58  
59  
60

educational attainment of these vulnerable children, and would help inform the development of effective interventions.

For peer review only

## Acknowledgments

We are extremely grateful to all the families who took part in this study, the midwives for their help in recruiting them, and the whole ALSPAC team, which includes interviewers, computer and laboratory technicians, clerical workers, research scientists, volunteers, managers, receptionists and nurses.

## Conflicts of interest

JM is a foster carer. AT, AB and DW have no conflicts of interest to declare.

## Funding

Core support for ALSPAC is provided by the UK Medical Research Council and Wellcome (Grant reference: 102215/2/13/2) and the University of Bristol. The Wellcome Trust (WT086118) funded ALSPACs linkage infrastructure through the Project to Enhance ALSPAC through Record Linkage (PEARL). This work was supported by the Elizabeth Blackwell Institute for Health Research, University of Bristol and the Wellcome Trust Institutional Strategic Support Fund (Grant number: 105612/Z/14/Z).

## Contributor Statement

JM and AB conceived the study, and AT and JM developed the research question. AT conducted the analyses, interpreted the data and drafted the manuscript. JM and DW helped interpret the data and critically revised the paper. AB critically revised the paper.

## Data Sharing Statement

The ALSPAC data management plan (available here: <http://www.bristol.ac.uk/alspac/researchers/data-access/documents/alspac-datamanagement-plan.pdf>) describes in detail the policy regarding data sharing, which is through a system of managed open access.

## REFERENCES

1. Department for Education, National Statistics. Outcomes for Children Looked After by Local Authorities in England, as at 31 March 2016 (SRF 12/2017). 2017 [Available from: [https://www.gov.uk/government/uploads/system/uploads/attachment\\_data/file/602087/SFR12\\_2017\\_Text.pdf](https://www.gov.uk/government/uploads/system/uploads/attachment_data/file/602087/SFR12_2017_Text.pdf)].
2. Ford T, Vostanis P, Meltzer H, Goodman R. Psychiatric disorder among British children looked after by local authorities: comparison with children living in private households. *The British Journal of Psychiatry*. 2007;190(4):319-25.
3. Oswald SH, Heil K, Goldbeck L. History of Maltreatment and Mental Health Problems in Foster Children: A Review of the Literature. *Journal of Pediatric Psychology*. 2010;35(5):462-72.
4. Ward J, Henderson Z, Pearson G. One problem among many: drug use among care leavers in transition to independent living 2003 [Available from: [http://www.drugsandalcohol.ie/5584/1/Home\\_Office\\_Research\\_Study\\_260\\_One\\_problem\\_among\\_many.pdf](http://www.drugsandalcohol.ie/5584/1/Home_Office_Research_Study_260_One_problem_among_many.pdf)].
5. Viner RM, Taylor B. Adult Health and Social Outcomes of Children Who Have Been in Public Care: Population-Based Study. *Pediatrics*. 2005;115(4):894-9.
6. Botchway SK, Quigley MA, Gray R. Pregnancy-associated outcomes in women who spent some of their childhood looked after by local authorities: findings from the UK Millennium Cohort Study. *BMJ Open*. 2014;4(12).
7. Bellis MA, Lowey H, Leckenby N, Hughes K, Harrison D. Adverse childhood experiences: retrospective study to determine their impact on adult health behaviours and health outcomes in a UK population. *Journal of Public Health*. 2014;36(1):81-91.
8. Hughes K, Lowey H, Quigg Z, Bellis MA. Relationships between adverse childhood experiences and adult mental well-being: results from an English national household survey. *BMC Public Health*. 2016;16(1):222.
9. Plant DT, Jones FW, Pariante CM, Pawlby S. Association between maternal childhood trauma and offspring childhood psychopathology: mediation analysis from the ALSPAC cohort. *The British Journal of Psychiatry*. 2017.
10. Teyhan A, Wijedasa D, Macleod J. Adult psychosocial outcomes of men and women who were looked-after or adopted as children: prospective observational study. *BMJ Open*. 2018.
11. Children's commissioner for England. On measuring the number of vulnerable children in England 2017 [Available from: <https://www.childrenscommissioner.gov.uk/wp-content/uploads/2017/07/CCO-On-vulnerability-Overveiw-2.pdf>].
12. Mezey G, Robinson F, Campbell R, Gillard S, Macdonald G, Meyer D, et al. Challenges to undertaking randomised trials with looked after children in social care settings. *Trials*. 2015;16(1):206.
13. Department for Education. Children in need census 2017 to 2018. Guide for local authorities - version 1.2 2018 [Available from: [https://assets.publishing.service.gov.uk/government/uploads/system/uploads/attachment\\_data/file/695113/CIN17-18\\_Guide\\_v1.2-web\\_version.pdf](https://assets.publishing.service.gov.uk/government/uploads/system/uploads/attachment_data/file/695113/CIN17-18_Guide_v1.2-web_version.pdf)].
14. Department for Education. Characteristics of children in need: 2016 to 2017 England (SFR 61/2017)2017 Accessed February 2018. Available from: [https://www.gov.uk/government/uploads/system/uploads/attachment\\_data/file/656395/SFR61-2017\\_Main\\_text.pdf](https://www.gov.uk/government/uploads/system/uploads/attachment_data/file/656395/SFR61-2017_Main_text.pdf).
15. Department for Education, National Statistics. Children looked after in England (including adoption), year ending 31 March 2017 (SFR 20/2017)2017 Accessed February 2018. Available from: [https://www.gov.uk/government/uploads/system/uploads/attachment\\_data/file/664995/SFR50\\_2017-Children\\_looked\\_after\\_in\\_England.pdf](https://www.gov.uk/government/uploads/system/uploads/attachment_data/file/664995/SFR50_2017-Children_looked_after_in_England.pdf).
16. Fletcher J, Strand S, Thomas S. The Educational Progress of Looked After Children in England.

1  
2  
3 Technical Report 1: Secondary School Progress and Attainment 2015 [Available from:

4 [http://reescentre.education.ox.ac.uk/wordpress/wp-](http://reescentre.education.ox.ac.uk/wordpress/wp-content/uploads/2015/11/EducationalProgressLookedAfterChildrenTechnical-Report-1_Nov2015.pdf)  
5 [content/uploads/2015/11/EducationalProgressLookedAfterChildrenTechnical-Report-](http://reescentre.education.ox.ac.uk/wordpress/wp-content/uploads/2015/11/EducationalProgressLookedAfterChildrenTechnical-Report-1_Nov2015.pdf)  
6 [1\\_Nov2015.pdf](http://reescentre.education.ox.ac.uk/wordpress/wp-content/uploads/2015/11/EducationalProgressLookedAfterChildrenTechnical-Report-1_Nov2015.pdf).

7  
8 17. Sebba J, Berridge D, Luke N, Fletcher J, Bell K, Strand S, et al. The Educational Progress of  
9 Looked After Children in England: Linking Care and Educational Data 2015 [Available from:

10 [http://reescentre.education.ox.ac.uk/wordpress/wp-](http://reescentre.education.ox.ac.uk/wordpress/wp-content/uploads/2015/11/EducationalProgressLookedAfterChildrenOverviewReport_Nov2015.pdf)  
11 [content/uploads/2015/11/EducationalProgressLookedAfterChildrenOverviewReport\\_Nov2015.pdf](http://reescentre.education.ox.ac.uk/wordpress/wp-content/uploads/2015/11/EducationalProgressLookedAfterChildrenOverviewReport_Nov2015.pdf).

12 18. Berridge D. Educating young people in care: What have we learned? Children and Youth  
13 Services Review. 2012;34(6):1171-5.

14 19. Boyd A, Golding J, Macleod J, Lawlor DA, Fraser A, Henderson J, et al. Cohort Profile: The  
15 'Children of the 90s'—the index offspring of the Avon Longitudinal Study of Parents and Children.  
16 International Journal of Epidemiology. 2012.

17 20. Fraser A, Macdonald-Wallis C, Tilling K, Boyd A, Golding J, Davey Smith G, et al. Cohort  
18 Profile: The Avon Longitudinal Study of Parents and Children: ALSPAC mothers cohort. International  
19 Journal of Epidemiology. 2013;42(1):97-110.

20 21. ALSPAC. Data Dictionary [Available from: [http://bristol.ac.uk/alspac/researchers/data-](http://bristol.ac.uk/alspac/researchers/data-access/data-dictionary/)  
21 [access/data-dictionary/](http://bristol.ac.uk/alspac/researchers/data-access/data-dictionary/)].

22 22. Boyd A, Tilling K, Cornish R, Davies A, Humphries K, Macleod J. Professionally designed  
23 information materials and telephone reminders improved consent response rates: evidence from an  
24 RCT nested within a cohort study. Journal of Clinical Epidemiology. 2015;68(8):877-87.

25 23. Mc Grath-Lone L, Harron K, Dearden L, Nasim B, Gilbert R. Data Resource Profile: Children  
26 Looked After Return (CLA). International Journal of Epidemiology. 2016;45(3):716-7f.

27 24. Emmott E, Jay M, Woodman J. Cohort Profile: Children in Need Census (CIN) Records of  
28 Vulnerable Children in England (pre-print). BMJ Open. 2018.

29 25. Department for Education. The National Pupil Database: User Guide 2015 [Available from:  
30 [www.gov.uk/government/uploads/system/uploads/attachment\\_data/file/472700/NPD\\_user\\_guide.](http://www.gov.uk/government/uploads/system/uploads/attachment_data/file/472700/NPD_user_guide.pdf)  
31 [pdf](http://www.gov.uk/government/uploads/system/uploads/attachment_data/file/472700/NPD_user_guide.pdf)].

32 26. National Pupil Database in England Wiki. KS4 2016 [Available from:  
33 <https://nationalpupildatabase.wikispaces.com/KS4>].

34 27. Thorpe K. A study of the use of the Edinburgh postnatal depression scale with parent groups  
35 outside the postpartum period. Journal of Reproductive and Infant Psychology. 1993;11(2):119-25.

36 28. GOV.UK. Apply for free school meals 2018 [Available from: [https://www.gov.uk/apply-free-](https://www.gov.uk/apply-free-school-meals)  
37 [school-meals](https://www.gov.uk/apply-free-school-meals)].

38 29. Department for Communities and Local Government. The English Indices of Deprivation  
39 2015 [Available from:  
40 [https://www.gov.uk/government/uploads/system/uploads/attachment\\_data/file/465791/English\\_I](https://www.gov.uk/government/uploads/system/uploads/attachment_data/file/465791/English_Indices_of_Deprivation_2015_-_Statistical_Release.pdf)  
41 [ndices\\_of\\_Deprivation\\_2015\\_-\\_Statistical\\_Release.pdf](https://www.gov.uk/government/uploads/system/uploads/attachment_data/file/465791/English_Indices_of_Deprivation_2015_-_Statistical_Release.pdf)].

42 30. Hirsch D. Experiences of poverty and educational disadvantage 2007 [Available from:  
43 <https://www.jrf.org.uk/report/experiences-poverty-and-educational-disadvantage>].

44 31. Goodman A, Gregg P. Poorer children's educational attainment: how important are attitudes  
45 and behaviour? 2010 [Available from: [https://www.jrf.org.uk/report/poorer-children%E2%80%99s-](https://www.jrf.org.uk/report/poorer-children%E2%80%99s-educational-attainment-how-important-are-attitudes-and-behaviour)  
46 [educational-attainment-how-important-are-attitudes-and-behaviour](https://www.jrf.org.uk/report/poorer-children%E2%80%99s-educational-attainment-how-important-are-attitudes-and-behaviour)].

47 32. Scott-Goodwin AC, Puerto M, Moreno I. Toxic effects of prenatal exposure to alcohol,  
48 tobacco and other drugs. Reproductive Toxicology. 2016;61:120-30.

49 33. Sayal K, Heron J, Draper E, Alati R, Lewis SJ, Fraser R, et al. Prenatal exposure to binge  
50 pattern of alcohol consumption: mental health and learning outcomes at age 11. European child &  
51 adolescent psychiatry. 2014;23(10):891-9.

52 34. Alati R, Davey Smith G, Lewis SJ, Sayal K, Draper ES, Golding J, et al. Effect of Prenatal Alcohol  
53 Exposure on Childhood Academic Outcomes: Contrasting Maternal and Paternal Associations in the  
54 ALSPAC Study. PLOS ONE. 2013;8(10):e74844.

- 1  
2  
3 35. McQuire C, Mukherjee R, Hurt L, Higgins A, Greene G, Farewell D, et al. Screening prevalence  
4 of fetal alcohol spectrum disorders in a region of the United Kingdom: A population-based birth-  
5 cohort study. *Preventive Medicine*. 2019;118:344-51.  
6  
7 36. Bakhireva LN, Garrison L, Shrestha S, Sharkis J, Miranda R, Rogers K. Challenges of diagnosing  
8 fetal alcohol spectrum disorders in foster and adopted children. *Alcohol*. 2018;67:37-43.  
9  
10 37. Kristjansson AL, Thomas S, Lilly CL, Thorisdottir IE, Allegrante JP, Sigfusdottir ID. Maternal  
11 smoking during pregnancy and academic achievement of offspring over time: A registry data-based  
12 cohort study. *Preventive Medicine*. 2018;113:74-9.  
13  
14 38. Lambe M, Hultman C, Torrens A, MacCabe J, et al. Maternal Smoking during Pregnancy  
15 and School Performance at Age 15. *Epidemiology*. 2006;17(5):524-30.  
16  
17 39. Knopik VS. Maternal smoking during pregnancy and child outcomes: real or spurious effect?  
18 *Dev Neuropsychol*. 2009;34(1):1-36.  
19  
20 40. Lo A, Roben CKP, Maier C, Fabian K, Shauffer C, Dozier M. "I want to be there when he  
21 graduates:" Foster parents show higher levels of commitment than group care providers. *Children*  
22 and Youth Services Review. 2015;51:95-100.  
23  
24 41. Luke N, Sinclair I, O'Higgins A. The Educational Progress of Looked After Children in England.  
25 Technical report 2: Relating Care to Educational Attainment and Progress 2015 [Available from:  
26 [https://weblearn.ox.ac.uk/access/content/group/5cacf183-ce54-47f0-9f17-](https://weblearn.ox.ac.uk/access/content/group/5cacf183-ce54-47f0-9f17-d4b0fe1cf292/EducationalProgressLookedAfterChildrenTechnical%20Report%202_Nov2015.pdf)  
27 [d4b0fe1cf292/EducationalProgressLookedAfterChildrenTechnical%20Report%202\\_Nov2015.pdf](https://weblearn.ox.ac.uk/access/content/group/5cacf183-ce54-47f0-9f17-d4b0fe1cf292/EducationalProgressLookedAfterChildrenTechnical%20Report%202_Nov2015.pdf).  
28  
29 42. Hutchings HA, Evans A, Barnes P, Demmler J, Heaven M, Hyatt MA, et al. Do children who  
30 move home and school frequently have poorer educational outcomes in their early years at school?  
31 An anonymised cohort study. *PloS one*. 2013;8(8):e70601.  
32  
33 43. Strand S, Demie F. Pupil mobility, attainment and progress in secondary school. *Educational*  
34 *Studies*. 2007;33(3):313-31.  
35  
36  
37  
38  
39  
40  
41  
42  
43  
44  
45  
46  
47  
48  
49  
50  
51  
52  
53  
54  
55  
56  
57  
58  
59  
60

**Figure Legends**

Figure 1 – Flow Chart of Sample

Figure 2 - Maternal questionnaire response rates by child social care status

For peer review only

1  
2  
3  
4  
5  
6  
7  
8  
9  
10  
11  
12  
13  
14  
15  
16  
17  
18  
19  
20  
21  
22  
23  
24  
25  
26  
27  
28  
29  
30  
31  
32  
33  
34  
35  
36  
37  
38  
39  
40  
41  
42  
43  
44  
45  
46  
47  
48  
49  
50  
51  
52  
53  
54  
55  
56  
57  
58  
59  
60

1  
2  
3  
4  
5  
6  
7  
8  
9  
10  
11  
12  
13  
14  
15  
16  
17  
18  
19  
20  
21  
22  
23  
24  
25  
26  
27  
28  
29  
30  
31  
32  
33  
34  
35  
36  
37  
38  
39  
40  
41  
42  
43  
44  
45  
46  
47  
48  
49  
50  
51  
52  
53  
54  
55  
56  
57  
58  
59  
60

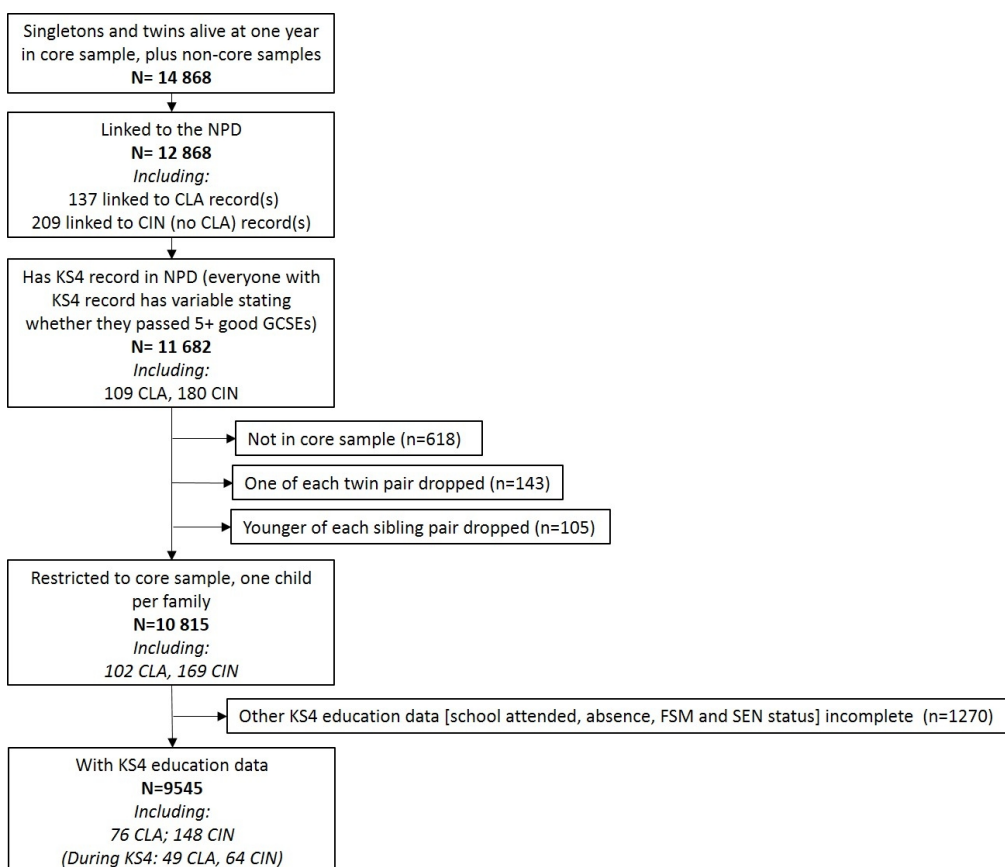

Figure 1 - Flow Chart of Sample  
218x189mm (150 x 150 DPI)

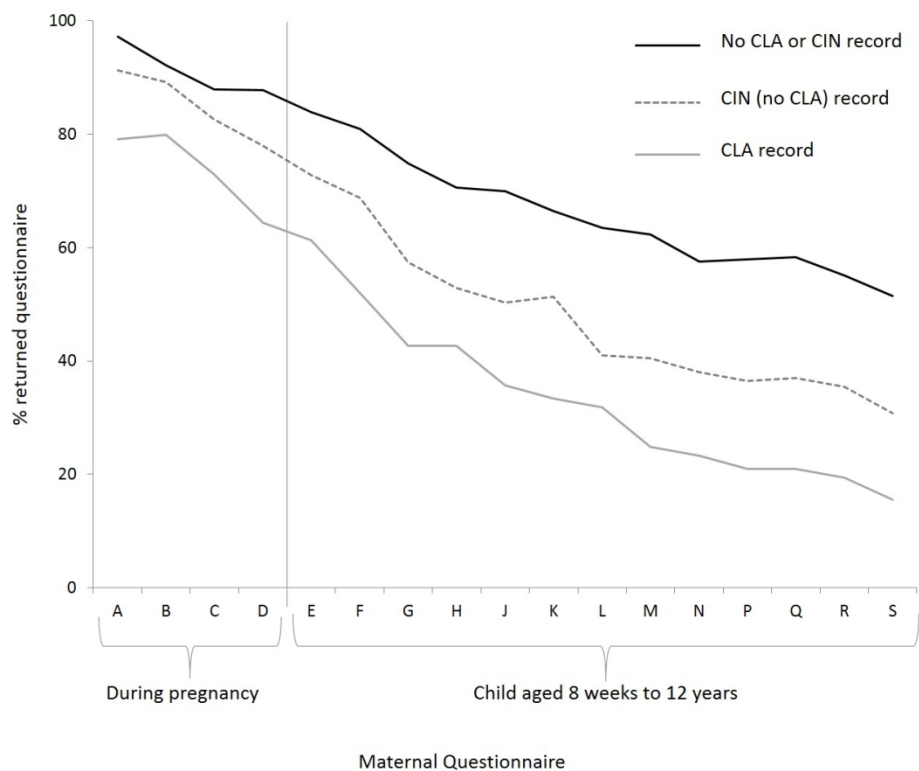

Notes on figure:

Sample restricted to mothers in the core sample, whose child has been linked to the National Pupil Database.

Mothers may not have completed every question within each questionnaire.

Figure 2 - Maternal questionnaire response rates by child social care status

231x223mm (150 x 150 DPI)



## Supplementary (online only) Tables

**Table A:** Summary of CLA and CIN data availability by year and period of birth

**Table B:** Summary of early-life (maternal and family) variables before and after multiple imputation

**Table C:** Summary of CIN data for ALSPAC participants linked to a post-2008 CLA record

**Table D:** Summary of care data for ALSPAC participants linked to a post-2005 CLA record

**Table E:** Comparison of care characteristics between ALSPAC CLA participants and CLA individuals in general population (in ALSPAC area and in England) of same age.

**Table F:** Educational attainment, absence, and special educational needs by care status – no SEN

**Table G:** Educational attainment, absence, and special educational needs by care status – no disability

**Table A: Summary of CLA and CIN data availability by year and period of birth**

| Period of birth                | Expected school year in March of each year <sup>1</sup> |                            |                            |                            |                     |                     |
|--------------------------------|---------------------------------------------------------|----------------------------|----------------------------|----------------------------|---------------------|---------------------|
|                                | 2006 <sup>2</sup>                                       | 2007 <sup>2</sup>          | 2008 <sup>2</sup>          | 2009 <sup>2,3</sup>        | 2010 <sup>2,3</sup> | 2011 <sup>2,3</sup> |
| April 1991 to August 1991      | Year 10                                                 | <b>Year 11<sup>4</sup></b> | Year 12                    | Year 13                    |                     |                     |
| September 1991 to August 1992  | Year 9                                                  | Year 10                    | <b>Year 11<sup>4</sup></b> | Year 12                    | Year 13             |                     |
| September 1992 to January 1993 | Year 8                                                  | Year 9                     | Year 10                    | <b>Year 11<sup>4</sup></b> | Year 12             | Year 13             |

<sup>1</sup> The school year in England runs from September to July. In contrast, the CLA and CIN data collection year runs from April to March. For example, the 2006 CLA dataset would cover the period from April 2005 to March 2006; the oldest ALSPAC participants would have been in Year 10 in March 2006, and the youngest in Year 8.

<sup>2</sup> CLA data linked to NPD available

<sup>3</sup> CIN data linked to NPD available

<sup>4</sup> GCSE exams are taken in May/June of Year 11.

#### **Determining who had CIN record during KS4:**

For the CIN data, the youngest cohort participants were in Year 11 at the time of the earliest CIN data collection and they were coded as being 'in need during KS4' if they had a CIN record. However, the majority of the cohort were already in Year 12 or 13 at this time, and so we calculated the age they had been referred, and identified those who had been referred before they sat their KS4 exams (age on the 1st June of the year they were in Year 11 was used as a proxy for age that exams were taken).

**Table B: Summary of early-life (maternal and family) variables before and after multiple imputation**

| Variables with missing data in study sample <sup>1</sup>   | % missing | Categories <sup>2</sup>     | Study sample [N=9545]                                          |                  |
|------------------------------------------------------------|-----------|-----------------------------|----------------------------------------------------------------|------------------|
|                                                            |           |                             | Before imputation [N specified for each variable individually] | Imputed [N=9545] |
| <b>Variables reported by mother during pregnancy</b>       |           |                             |                                                                |                  |
| Relationship status                                        | 5.2       |                             | N=9048                                                         |                  |
|                                                            |           | Married (%)                 | 75.7 (74.8-76.6)                                               | 74.7 (73.8-75.6) |
|                                                            |           | Resident partner (%)        | 16.1 (15.3-16.8)                                               | 16.5 (15.8-17.3) |
|                                                            |           | Non-resident/no partner (%) | 8.2 (7.7-8.8)                                                  | 8.7 (8.1-9.3)    |
| Highest maternal education                                 | 9.7       |                             | N=8623                                                         |                  |
|                                                            |           | A Level or degree (%)       | 31.7 (30.8-32.7)                                               | 30.5 (29.5-31.4) |
|                                                            |           | O Level                     | 36.8 (35.8-37.9)                                               | 36.5 (35.5-37.5) |
|                                                            |           | Vocational/none (%)         | 31.4 (30.4-32.4)                                               | 33.0 (32.0-34.0) |
| Financial difficulties                                     | 12.1      |                             | N=8387                                                         |                  |
|                                                            |           | Q1 (none) (%)               | 34.9 (33.9-35.9)                                               | 33.7 (32.7-34.7) |
|                                                            |           | Q4 (high) (%)               | 20.4 (19.5-21.3)                                               | 21.5 (20.6-22.4) |
| Housing tenure                                             | 5.7       |                             | N=9003                                                         |                  |
|                                                            |           | Owned/mortgaged (%)         | 74.6 (73.6-75.4)                                               | 73.4 (72.5-74.3) |
| Maternal smoking                                           | 5.0       |                             | N=9068                                                         |                  |
|                                                            |           | Yes (%)                     | 26.2 (25.3-27.1)                                               | 26.9 (26.0-27.8) |
| Depression score                                           | 13.1      |                             | N=8294                                                         |                  |
|                                                            |           | Highest quartile (%)        | 22.7 (21.8-23.6)                                               | 23.5 (22.6-24.5) |
| Frequency of alcohol drinking in first trimester           | 6.0       |                             | N=8975                                                         |                  |
|                                                            |           | Never or <1 unit/week       | 84.8 (84.1-85.6)                                               | 84.8 (84.1-85.5) |
|                                                            |           | 1-6 units or 7+ units/week  | 15.2 (14.4-15.9)                                               | 15.2 (14.5-15.9) |
| Any days drinking ≥4 units alcohol during second trimester | 6.2       |                             | N=8950                                                         |                  |
|                                                            |           | Yes                         | 16.8 (16.0-17.5)                                               | 16.9 (16.2-17.7) |
| Low social support                                         | 16.8      |                             | N=7942                                                         |                  |
|                                                            |           | Yes (%)                     | 9.3 (8.7-10.0)                                                 | 10.5 (9.8-11.2)  |
| <b>Educational attainment from NPD</b>                     |           |                             |                                                                |                  |
| Capped percentage point score <sup>3</sup>                 | 0.9       | Mean                        | 68.8 (68.4-69.2)                                               | 68.5 (68.1-68.9) |

<sup>1</sup> The following variables had no missing data in study sample: child age, sex, maternal age at delivery, attainment of 5+ good GCSEs, persistent absence, SEN status, school attended.

<sup>2</sup> For brevity, not all categories are presented for each variable.

<sup>3</sup> The binary attainment variable (5+ good GCSEs) was complete for all those with a KS4 NPD record, but a small number (n=82) had missing capped point score data.

**Table C: Summary of CIN data for ALSPAC participants linked to a post-2008 CIN record (but no CLA record)**

| Variable                              |                                              | CIN (no CLA) record<br>N=209 |
|---------------------------------------|----------------------------------------------|------------------------------|
| Age (yrs) at referral date            | Median (range)                               | 16.7 (2.5-18.1)              |
| Primary need status                   | Abuse or neglect (% , 95% CI)                | 22.0 (16.9-28.2)             |
|                                       | Child disability/illness (% , 95% CI)        | 23.4 (18.2-29.7)             |
|                                       | Parental illness/disability (% , 95% CI)     | [n<5]                        |
|                                       | Family in acute stress (% , 95% CI)          | 21.5 (16.4-27.7)             |
|                                       | Family dysfunction (% , 95% CI)              | 18.2 (13.5-24.1)             |
|                                       | Socially unacceptable behaviour (% , 95% CI) | [n<5]                        |
|                                       | Low income (% , 95% CI)                      | [n<5]                        |
|                                       | Absent parenting (% , 95% CI)                | [n<5]                        |
|                                       | Cases other than CIN (% , 95% CI)            | [n<5]                        |
|                                       | Not stated (% , 95% CI)                      | 10.0 (6.6-15.0)              |
| Child ever coded as having disability | Yes (% , 95% CI)                             | 22.0 (16.9-28.2)             |

**Table D: Summary of care data for ALSPAC participants linked to a post-2005 CLA record**

| Variable                                                              |                                                              | Linked to CLA record |                                                       |                                                          |
|-----------------------------------------------------------------------|--------------------------------------------------------------|----------------------|-------------------------------------------------------|----------------------------------------------------------|
|                                                                       |                                                              | Overall<br>n=137     | Eligible for one-third<br>sample <sup>1</sup><br>n=47 | Ineligible for one-<br>third sample <sup>2</sup><br>n=90 |
| Total number of periods of care <sup>3</sup>                          | Median, range                                                | 1 (1-13)             | 1 (1-8)                                               | 1 (1-13)                                                 |
| Total number of episodes of care <sup>3</sup>                         | Median, range                                                | 3 (1-28)             | 3 (1-24)                                              | 3 (1-28)                                                 |
| Age (yrs) at start of first period of care <sup>3</sup>               | Median, range                                                | 13.2 (0-17.8)        | 11.5 (0-17.6)                                         | 13.7 (0.1-17.8)                                          |
| Age (yrs) at end of last episode of care <sup>3</sup>                 | Median, range                                                | 17.7 (13.1-18.0)     | 18.0 (13.1-18.0)                                      | 17.1 (13.2-18.0)                                         |
|                                                                       |                                                              | N=134                | N=45                                                  | N=89                                                     |
| Total duration (days) in care <sup>3,4</sup>                          | Median, range                                                | 906 (1-5736)         | 1394 (2-5498)                                         | 604 (1-5736)                                             |
| Primary need category at start of first period of care <sup>3,5</sup> | Abuse or neglect (%; 95% CI)                                 | 30.7 (23.4-39.0)     | 34.4 (21.6-49.1)                                      | 28.9 (20.3-39.3)                                         |
|                                                                       | Child disability (%; 95% CI)                                 | 16.1 (10.8-23.3)     | 19.1 (10.0-33.5)                                      | 14.4 (8.5-23.5)                                          |
|                                                                       | Parental illness/disability (%; 95% CI) <sup>6</sup>         | 4.4 (2.0-9.5)        | /                                                     | /                                                        |
|                                                                       | Family in acute stress (%; 95% CI)                           | 18.2 (12.6-25.7)     | 17.0 (8.5-31.1)                                       | 18.9 (12.0-28.5)                                         |
|                                                                       | Family dysfunction (%; 95% CI)                               | 17.5 (12.0-24.9)     | 25.5 (14.8-40.4)                                      | 13.3 (7.6-22.2)                                          |
|                                                                       | Socially unacceptable behaviour (%; 95% CI) <sup>6</sup>     | 8.8 (5.0-14.9)       | /                                                     | /                                                        |
|                                                                       | Absent parenting (%; 95% CI) <sup>6</sup>                    | 4.4 (2.0-9.5)        | /                                                     | /                                                        |
| Placement type for last episode of care                               | Foster care (%; 95% CI)                                      | 62.8 (54.3-70.5)     | 57.4 (42.6-71.1)                                      | 65.6 (55.0-74.8)                                         |
|                                                                       | Children's/residential/care home or school (%; 95% CI)       | 18.2 (12.6-25.7)     | 23.4 (13.2-38.1)                                      | 15.6 (9.3-24.8)                                          |
|                                                                       | Other (%; 95% CI)                                            | 19.0 (13.2-26.5)     | 19.1 (10.0-33.5)                                      | 18.9 (12.0-28.5)                                         |
| Reason for last episode of care ending                                | Returned home to parents or relatives (%; 95% CI)            | 36.5 (28.8-45.0)     | 27.7 (16.5-42.6)                                      | 41.1 (31.3-51.7)                                         |
|                                                                       | Moved to independent living (%; 95% CI)                      | 16.8 (11.4-24.1)     | 19.1 (10.0-33.4)                                      | 15.6 (9.3-24.8)                                          |
|                                                                       | Residential care funded by adult social services (%; 95% CI) | 13.1 (8.3-20.0)      | 21.3 (11.6-35.8)                                      | 8.9 (4.4-17.0)                                           |
|                                                                       | Other (%; 95% CI)                                            | 32.8 (25.4-41.2)     | 31.9 (19.9-47.0)                                      | 34.4 (25.2-45.0)                                         |

<sup>1</sup>Individuals eligible for the one-third sample will have CLA records in the period 1998-2003 if they were looked-after during this time.

<sup>2</sup>No CLA data were collected from 2008-2003 for those ineligible for the one-third sample; therefore their looked-after status during this period is unknown.

<sup>3</sup>Measures relate to the data available from linkage only: these should be complete for those eligible for the one-third sample, but will not be for those in the ineligible sample who were looked-after during 1998-2003.

<sup>4</sup>The sum of the duration of all episodes of care, which may or may not have been consecutive.

<sup>5</sup>Refers to primary need at the start of the first period of care for which we have a record.

<sup>6</sup>Percentages not shown by one-third sample status for these need categories to prevent derivation of small cell counts (n<5).

**Table E: Comparison of care characteristics between ALSPAC participants with CLA records and individuals with CLA records in general population of same age (in ALSPAC area and in England).**

|                                                                       |                                                  | Born 1991 or 1992<br>with CLA record in<br>England <sup>1</sup> | Born 1991 or 1992<br>with CLA record in<br>ALSPAC area <sup>1,2</sup> | ALSPAC participants<br>with CLA record |
|-----------------------------------------------------------------------|--------------------------------------------------|-----------------------------------------------------------------|-----------------------------------------------------------------------|----------------------------------------|
|                                                                       |                                                  | n=43938                                                         | n=713                                                                 | n=137                                  |
| Total number of periods of care <sup>3</sup>                          | Median, range                                    | 1 (1-516)                                                       | 1 (1-46)                                                              | 1 (1-13)                               |
| Total number of episodes of care <sup>3</sup>                         | Median, range                                    | 2 (1-517)                                                       | 2 (1-49)                                                              | 3 (1-28)                               |
| Age (yrs) at start of first period of care <sup>3</sup>               | Median, range                                    | 9.7 (0-18)                                                      | 7.6 (0-18)                                                            | 13.2 (0-17.8)                          |
| Age (yrs) at end of last episode of care <sup>3</sup>                 | Median, range                                    | 15.5 (0-19.9)                                                   | 14.2 (0-18.2)                                                         | 17.7 (13.1-18.0)                       |
| Last period of care ended <12yrs                                      | Yes (%; 95% CI)                                  | 35.6 (35.2-36.1)                                                | 41.9 (38.4-45.6)                                                      | 0                                      |
|                                                                       |                                                  | n=43554                                                         | n=707                                                                 | n=134                                  |
| Total duration (days) in care <sup>3,4</sup>                          | Median, range                                    | 461 (1-6575)                                                    | 427 (1-6069)                                                          | 906 (1-5736)                           |
|                                                                       |                                                  | n=30250                                                         | n=453                                                                 | n=137                                  |
| Primary need category at start of first period of care <sup>3,5</sup> | Abuse or neglect (%; 95% CI)                     | 35.3 (34.8-35.9)                                                | 26.3 (22.4-30.5)                                                      | 30.7 (23.4-39.0)                       |
|                                                                       | Child disability (%; 95% CI)                     | 12.7 (12.4-13.1)                                                | 16.1 (13.0-19.8)                                                      | 16.1 (10.8-23.3)                       |
|                                                                       | Parental illness/disability (%; 95% CI)          | 3.9 (3.7-4.1)                                                   | 5.1 (3.4-7.5)                                                         | 4.4 (2.0-9.5)                          |
|                                                                       | Family in acute stress (%; 95% CI)               | 10.9 (10.5-11.2)                                                | 18.5 (15.2-22.4)                                                      | 18.2 (12.6-25.7)                       |
|                                                                       | Family dysfunction (%; 95% CI)                   | 12.4 (12.0-12.8)                                                | 20.5 (17.0-24.5)                                                      | 17.5 (12.0-24.9)                       |
|                                                                       | Socially unacceptable behaviour (%; 95% CI)      | 6.3 (6.1-6.6)                                                   | 6.2 (4.3-8.8)                                                         | 8.8 (5.0-14.9)                         |
|                                                                       | Absent parenting (%; 95% CI)                     | 18.1 (17.7-18.6)                                                | 7.3 (5.2-10.1)                                                        | 4.4 (2.0-9.5)                          |
|                                                                       |                                                  | N=43602                                                         | N=712                                                                 | N=137                                  |
| Placement type for last episode of care                               | Foster care                                      | 32.8 (32.4-33.3)                                                | 42.0 (38.4-45.7)                                                      | 62.8 (54.3-70.5)                       |
|                                                                       | Children's/residential/care home/school          | 14.1 (13.7-14.4)                                                | 9.4 (7.5-11.8)                                                        | 18.2 (12.6-25.7)                       |
|                                                                       | Other                                            | 53.1 (52.6-53.6)                                                | 49.0 (44.9-52.3)                                                      | 19.0 (13.2-26.5)                       |
|                                                                       |                                                  | N=39,647                                                        | N=644                                                                 | N=137                                  |
| Reason for last episode of care ending                                | Returned home to parents or relatives            | 21.9 (21.5-22.3)                                                | 24.8 (21.7-28.3)                                                      | 36.5 (28.8-45.0)                       |
|                                                                       | Moved to independent living                      | 17.7 (17.4-18.1)                                                | 14.8 (12.2-17.7)                                                      | 16.8 (11.4-24.1)                       |
|                                                                       | Residential care funded by adult social services | 4.8 (4.5-5.0)                                                   | 7.6 (5.8-9.9)                                                         | 13.1 (8.3-20.0)                        |

<sup>1</sup>Excludes the 137 individuals identified as being in ALSPAC

<sup>2</sup>Includes only those in the care of one of the following local authorities: City of Bristol; Bath and North East Somerset; South Gloucestershire; North Somerset.

**Table F: Educational attainment, absence, and special educational needs by care status excluding those with SEN (n=8145)**

| <b>Outcome</b>                 | <b>Care status during KS4</b> | <b>Model 1<sup>1</sup><br/>(Age and Sex)</b> | <b>Model 2<sup>2</sup><br/>(KS4 variables)</b> | <b>Model 3<sup>3</sup><br/>(Early-life variables)</b> | <b>Model 4<sup>4</sup><br/>(Fully adjusted)</b> |
|--------------------------------|-------------------------------|----------------------------------------------|------------------------------------------------|-------------------------------------------------------|-------------------------------------------------|
|                                |                               | OR (95% CI)                                  | OR (95% CI)                                    | OR (95% CI)                                           | OR (95% CI)                                     |
| 5 A*-C GCSEs inc. Eng. & Maths | Not CIN or CLA                | Ref                                          | Ref                                            | Ref                                                   | Ref                                             |
|                                | CIN (not CLA)                 | 0.04 (0.01-0.36)                             | 0.08 (0.01-0.65)                               | 0.08 (0.01-0.68)                                      | 0.11 (0.01-1.02)                                |
|                                | CLA                           | 0.26 (0.09-0.77)                             | 0.31 (0.10-0.98)                               | 0.35 (0.11-1.10)                                      | 0.40 (0.12-1.31)                                |
|                                |                               |                                              |                                                |                                                       |                                                 |
|                                |                               | Coeff (95% CI)                               | Coeff (95% CI)                                 | Coeff (95% CI)                                        | Coeff (95% CI)                                  |
| Capped percentage score        | Not CIN or CLA                | Ref                                          | Ref                                            | Ref                                                   | Ref                                             |
|                                | CIN (not CLA)                 | -24.1 (-31.8 to -16.5)                       | -10.6 (-17.6 to -3.6)                          | -18.0 (-25.0 to -10.9)                                | -8.6 (-15.2 to -2.0)                            |
|                                | CLA                           | -26.7 (-33.3 to -20.0)                       | -21.1 (-27.1 to -15.1)                         | -22.8 (-28.9 to -16.7)                                | -18.7 (-24.4 to -13.0)                          |

<sup>1</sup>Adjusted for child age and sex

<sup>2</sup>Adjusted for child age and sex, plus KS4 time-point variables (persistent school absence, in receipt of free school meals, school mobility, IDACI of residential neighbourhood)

<sup>3</sup>Adjusted for child age and sex, plus early-life[maternal and SEP] variables (maternal age at delivery, education, partner status, housing tenure, financial difficulties, smoking, depression, social support)

<sup>4</sup>Adjusted for child age and sex, plus KS4 and early life variables

**Table G: Educational attainment, absence, and special educational needs by care status excluding those with a disability (n=9506)**

| <b>Outcome</b>                 | <b>Care status during KS4</b> | <b>Model 1<sup>1</sup><br/>(Age and Sex)</b> | <b>Model 2<sup>2</sup><br/>(KS4 variables)</b> | <b>Model 3<sup>3</sup><br/>(Early-life variables)</b> | <b>Model 4<sup>4</sup><br/>(Fully adjusted)</b> |
|--------------------------------|-------------------------------|----------------------------------------------|------------------------------------------------|-------------------------------------------------------|-------------------------------------------------|
|                                |                               | OR (95% CI)                                  | OR (95% CI)                                    | OR (95% CI)                                           | OR (95% CI)                                     |
| 5 A*-C GCSEs inc. Eng. & Maths | Not CIN or CLA                | Ref                                          | Ref                                            | Ref                                                   | Ref                                             |
|                                | CIN (not CLA)                 | 0.07 (0.02-0.25)                             | 0.12 (0.03-0.43)                               | 0.13 (0.04-0.45)                                      | 0.18 (0.05-0.65)                                |
|                                | CLA                           | 0.17 (0.07-0.43)                             | 0.19 (0.07-0.49)                               | 0.28 (0.11-0.73)                                      | 0.29 (0.11-0.76)                                |
|                                |                               |                                              |                                                |                                                       |                                                 |
|                                |                               | Coeff (95% CI)                               | Coeff (95% CI)                                 | Coeff (95% CI)                                        | Coeff (95% CI)                                  |
| Capped percentage score        | Not CIN or CLA                | Ref                                          | Ref                                            | Ref                                                   | Ref                                             |
|                                | CIN (not CLA)                 | -25.7 (-31.7 to -19.6)                       | -12.9 (-18.5 to -7.4)                          | -19.0 (-24.5 to -13.4)                                | -10.7 (-16.0 to -5.5)                           |
|                                | CLA                           | -28.6 (-34.2 to -23.0)                       | -24.6 (-29.7 to -19.5)                         | -22.8 (-28.0 to -17.6)                                | -20.8 (-25.7 to -16.0)                          |

<sup>1</sup>Adjusted for child age and sex

<sup>2</sup>Adjusted for child age and sex, plus KS4 time-point variables (persistent school absence, in receipt of free school meals, school mobility, IDACI of residential neighbourhood)

<sup>3</sup>Adjusted for child age and sex, plus early-life[maternal and SEP] variables (maternal age at delivery, education, partner status, housing tenure, financial difficulties, smoking, depression, social support)

<sup>4</sup>Adjusted for child age and sex, plus KS4 and early life variables



Supplementary Figure 1: Partner, child and teacher questionnaire response rates by child social care status

1  
2  
3  
4  
5  
6  
7

— No CLA or CIN record  
 - - - CIN (no CLA) record  
 — CLA record

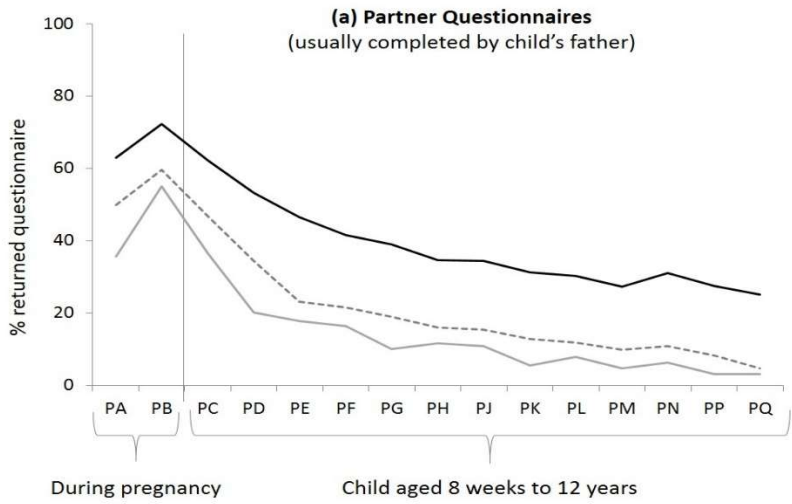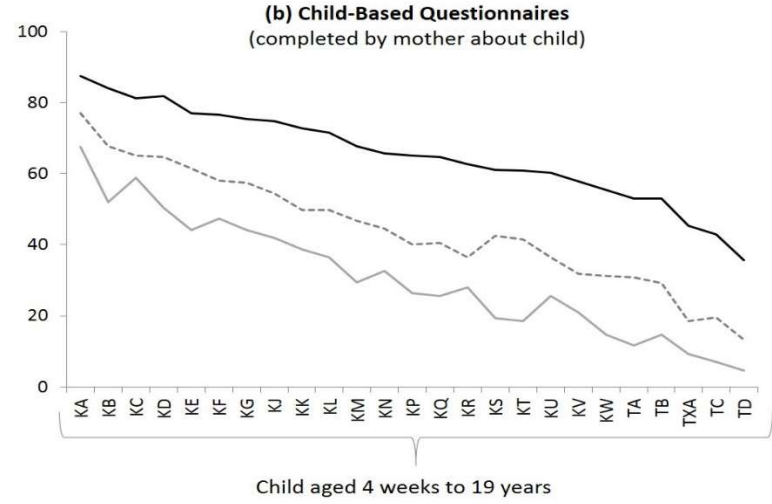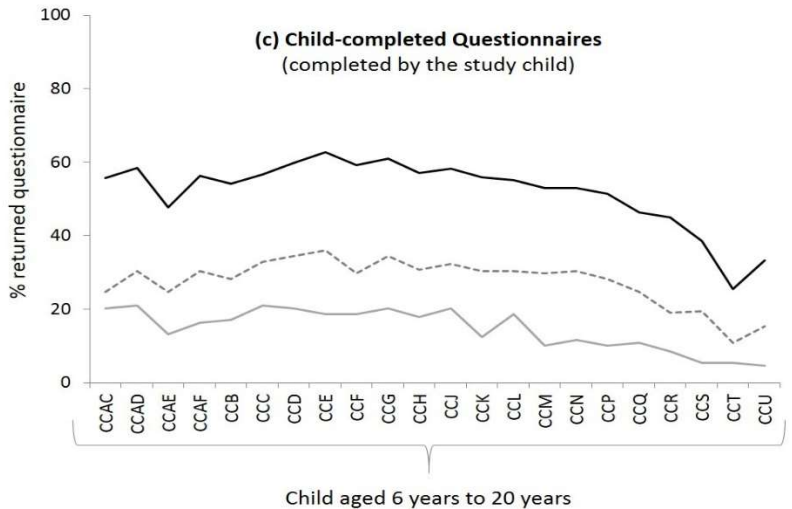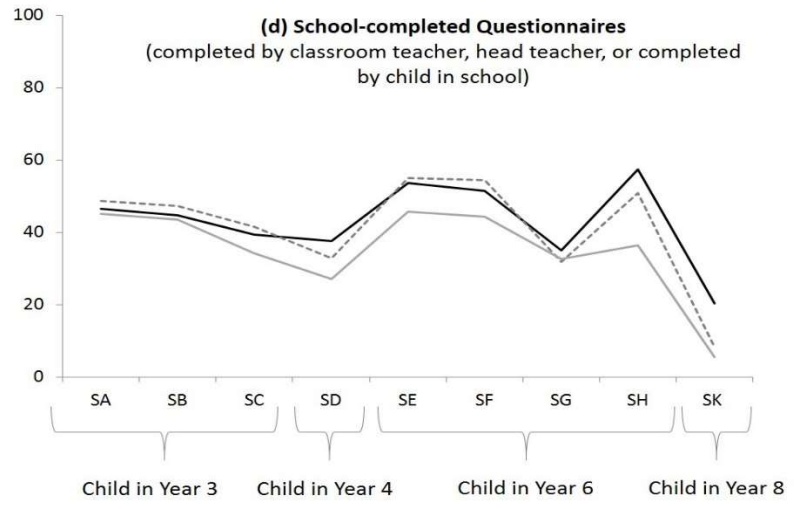

Early-life adversity, contact with children's social care services, and educational outcomes at age 16 years

Teyhan, Boyd, Wijedasa and Macleod

### Supplementary Text - Additional details on some variables

- **Special Educational Needs (SEN)**

**School Action (SA)** - used when there is evidence that a child is not making progress at school and there is a need for action to be taken to meet learning difficulties. This can include involvement of extra teachers, use of different learning materials, special equipment or a different teaching strategy.

**School Action Plus (SA+)** - used where SA has not been able to help the child make adequate progress. The school has sought external services from the local education authority (LEA), the local health authority, or social services to help the child make adequate progress (e.g. speech and language therapist, educational psychologist etc.).

**Statement of SEN** - if the additional help provided by SA+ is not enough then the child's school or parents can apply to the LEA for a Statutory Assessment of the child's SEN in order to try and obtain a statement of SEN. The 'statement' is a document which sets out a child's SEN and any additional help that the child should receive. A Statement is normally made when all the educational provision required to meet a child's needs cannot reasonably be met by the resources within a child's school at SA+.

- **Early-life, maternal and family characteristics**

The following maternal, family and socioeconomic measures were reported by the mothers during their pregnancy with the study child via postal questionnaires. The categories for each variable are given in parenthesis following the variable name.

**Highest educational qualification** (university degree/A level; O level; vocational/none)

Early-life adversity, contact with children's social care services, and educational outcomes at age 16 years

Teyhan, Boyd, Wijedasa and Macleod

**Financial Difficulties** (quartiles of score with range 0–40, where 0 is no financial difficulties)

**Housing tenure** (owned/mortgaged; private rent; council rent; other)

**Partner status** (husband; live with partner; do not live with partner/no partner)

**Smoking during pregnancy** (no; yes)

**Low social support** - measured by response to 10 items with a low score defined as being in the bottom 10% (no; yes).

**Maternal depression** - measured by the Edinburgh Postnatal Depression Scale. Although this measure was originally designed for use with postnatal women, none of the 10 items is specific to this period and it has been validated for use at other times; it was chosen as it does not contain somatic items that could confound normal symptoms in pregnancy with depression (27). Quartiles were derived.

- **Proxy measures of socio-economic position when child aged 16**

The following measures were obtained from the National Pupil Database.

**Child in receipt of free school meals (FSM)** - eligibility is based on low parental income (28) (no; yes)

**Child's residential neighbourhood deprivation** - measured by the Income Deprivation Affecting Children Index (IDACI) (29), which gives the proportion of children (<0-15yrs) in a neighbourhood (lower super output area, average population 1500) who live in a low income family (<10%; 10 to <20%; 20 to <30%; 40%+).

## STROBE Statement—checklist of items that should be included in reports of observational studies

|                              | Item No                                                                                                                                                                                                                                                                                                   | Recommendation                                                                                                                                                                                                                                                                                                                                                                                                                                                         | Page No |
|------------------------------|-----------------------------------------------------------------------------------------------------------------------------------------------------------------------------------------------------------------------------------------------------------------------------------------------------------|------------------------------------------------------------------------------------------------------------------------------------------------------------------------------------------------------------------------------------------------------------------------------------------------------------------------------------------------------------------------------------------------------------------------------------------------------------------------|---------|
| <b>Title and abstract</b>    | 1                                                                                                                                                                                                                                                                                                         | (a) Indicate the study's design with a commonly used term in the title or the abstract                                                                                                                                                                                                                                                                                                                                                                                 | 1,2     |
|                              |                                                                                                                                                                                                                                                                                                           | (b) Provide in the abstract an informative and balanced summary of what was done and what was found                                                                                                                                                                                                                                                                                                                                                                    | 2       |
| <b>Introduction</b>          |                                                                                                                                                                                                                                                                                                           |                                                                                                                                                                                                                                                                                                                                                                                                                                                                        |         |
| Background/rationale         | 2                                                                                                                                                                                                                                                                                                         | Explain the scientific background and rationale for the investigation being reported                                                                                                                                                                                                                                                                                                                                                                                   | 4-5     |
| Objectives                   | 3                                                                                                                                                                                                                                                                                                         | State specific objectives, including any prespecified hypotheses                                                                                                                                                                                                                                                                                                                                                                                                       | 5       |
| <b>Methods</b>               |                                                                                                                                                                                                                                                                                                           |                                                                                                                                                                                                                                                                                                                                                                                                                                                                        |         |
| Study design                 | 4                                                                                                                                                                                                                                                                                                         | Present key elements of study design early in the paper                                                                                                                                                                                                                                                                                                                                                                                                                | 5-6     |
| Setting                      | 5                                                                                                                                                                                                                                                                                                         | Describe the setting, locations, and relevant dates, including periods of recruitment, exposure, follow-up, and data collection                                                                                                                                                                                                                                                                                                                                        | 5-6     |
| Participants                 | 6                                                                                                                                                                                                                                                                                                         | (a) <i>Cohort study</i> —Give the eligibility criteria, and the sources and methods of selection of participants. Describe methods of follow-up<br><i>Case-control study</i> —Give the eligibility criteria, and the sources and methods of case ascertainment and control selection. Give the rationale for the choice of cases and controls<br><i>Cross-sectional study</i> —Give the eligibility criteria, and the sources and methods of selection of participants | 5       |
|                              |                                                                                                                                                                                                                                                                                                           | (b) <i>Cohort study</i> —For matched studies, give matching criteria and number of exposed and unexposed<br><i>Case-control study</i> —For matched studies, give matching criteria and the number of controls per case                                                                                                                                                                                                                                                 | N/A     |
| Variables                    | 7                                                                                                                                                                                                                                                                                                         | Clearly define all outcomes, exposures, predictors, potential confounders, and effect modifiers. Give diagnostic criteria, if applicable                                                                                                                                                                                                                                                                                                                               | 6-8     |
| Data sources/<br>measurement | 8*                                                                                                                                                                                                                                                                                                        | For each variable of interest, give sources of data and details of methods of assessment (measurement). Describe comparability of assessment methods if there is more than one group                                                                                                                                                                                                                                                                                   | 5-8     |
| Bias                         | 9                                                                                                                                                                                                                                                                                                         | Describe any efforts to address potential sources of bias                                                                                                                                                                                                                                                                                                                                                                                                              | 6,8,9   |
| Study size                   | 10                                                                                                                                                                                                                                                                                                        | Explain how the study size was arrived at                                                                                                                                                                                                                                                                                                                                                                                                                              | 5       |
| Quantitative variables       | 11                                                                                                                                                                                                                                                                                                        | Explain how quantitative variables were handled in the analyses. If applicable, describe which groupings were chosen and why                                                                                                                                                                                                                                                                                                                                           | 6-8     |
| Statistical methods          | 12                                                                                                                                                                                                                                                                                                        | (a) Describe all statistical methods, including those used to control for confounding                                                                                                                                                                                                                                                                                                                                                                                  | 8-9     |
|                              |                                                                                                                                                                                                                                                                                                           | (b) Describe any methods used to examine subgroups and interactions                                                                                                                                                                                                                                                                                                                                                                                                    | N/A     |
|                              | (c) Explain how missing data were addressed                                                                                                                                                                                                                                                               | 8                                                                                                                                                                                                                                                                                                                                                                                                                                                                      |         |
|                              | (d) <i>Cohort study</i> —If applicable, explain how loss to follow-up was addressed<br><i>Case-control study</i> —If applicable, explain how matching of cases and controls was addressed<br><i>Cross-sectional study</i> —If applicable, describe analytical methods taking account of sampling strategy | N/A                                                                                                                                                                                                                                                                                                                                                                                                                                                                    |         |
|                              | (e) Describe any sensitivity analyses                                                                                                                                                                                                                                                                     | 9                                                                                                                                                                                                                                                                                                                                                                                                                                                                      |         |

Continued on next page

1  
2  
3  
4  
5  
6  
7  
8  
9  
10  
11  
12  
13  
14  
15  
16  
17  
18  
19  
20  
21  
22  
23  
24  
25  
26  
27  
28  
29  
30  
31  
32  
33  
34  
35  
36  
37  
38  
39  
40  
41  
42  
43  
44  
45  
46  
47  
48  
49  
50  
51  
52  
53  
54  
55  
56  
57  
58  
59  
60

| <b>Results</b>           |     |                                                                                                                                                                                                              |         |
|--------------------------|-----|--------------------------------------------------------------------------------------------------------------------------------------------------------------------------------------------------------------|---------|
| Participants             | 13* | (a) Report numbers of individuals at each stage of study—eg numbers potentially eligible, examined for eligibility, confirmed eligible, included in the study, completing follow-up, and analysed            | Fig 1   |
|                          |     | (b) Give reasons for non-participation at each stage                                                                                                                                                         | Fig 1   |
|                          |     | (c) Consider use of a flow diagram                                                                                                                                                                           | Fig 1   |
| Descriptive data         | 14* | (a) Give characteristics of study participants (eg demographic, clinical, social) and information on exposures and potential confounders                                                                     | Table 1 |
|                          |     | (b) Indicate number of participants with missing data for each variable of interest                                                                                                                          | Table A |
|                          |     | (c) <i>Cohort study</i> —Summarise follow-up time (eg, average and total amount)                                                                                                                             | N/A     |
| Outcome data             | 15* | <i>Cohort study</i> —Report numbers of outcome events or summary measures over time                                                                                                                          | Table 2 |
|                          |     | <i>Case-control study</i> —Report numbers in each exposure category, or summary measures of exposure                                                                                                         | N/A     |
|                          |     | <i>Cross-sectional study</i> —Report numbers of outcome events or summary measures                                                                                                                           | N/A     |
| Main results             | 16  | (a) Give unadjusted estimates and, if applicable, confounder-adjusted estimates and their precision (eg, 95% confidence interval). Make clear which confounders were adjusted for and why they were included | Table 2 |
|                          |     | (b) Report category boundaries when continuous variables were categorized                                                                                                                                    | N/A     |
|                          |     | (c) If relevant, consider translating estimates of relative risk into absolute risk for a meaningful time period                                                                                             | N/A     |
| Other analyses           | 17  | Report other analyses done—eg analyses of subgroups and interactions, and sensitivity analyses                                                                                                               | 10      |
| <b>Discussion</b>        |     |                                                                                                                                                                                                              |         |
| Key results              | 18  | Summarise key results with reference to study objectives                                                                                                                                                     | 15      |
| Limitations              | 19  | Discuss limitations of the study, taking into account sources of potential bias or imprecision. Discuss both direction and magnitude of any potential bias                                                   | 15,17   |
| Interpretation           | 20  | Give a cautious overall interpretation of results considering objectives, limitations, multiplicity of analyses, results from similar studies, and other relevant evidence                                   | 17,18   |
| Generalisability         | 21  | Discuss the generalisability (external validity) of the study results                                                                                                                                        | 16      |
| <b>Other information</b> |     |                                                                                                                                                                                                              |         |
| Funding                  | 22  | Give the source of funding and the role of the funders for the present study and, if applicable, for the original study on which the present article is based                                                | 19      |

\*Give information separately for cases and controls in case-control studies and, if applicable, for exposed and unexposed groups in cohort and cross-sectional studies.

**Note:** An Explanation and Elaboration article discusses each checklist item and gives methodological background and published examples of transparent reporting. The STROBE checklist is best used in conjunction with this article (freely available on the Web sites of PLoS Medicine at <http://www.plosmedicine.org/>, Annals of Internal Medicine at <http://www.annals.org/>, and Epidemiology at <http://www.epidem.com/>). Information on the STROBE Initiative is available at [www.strobe-statement.org](http://www.strobe-statement.org).
