# Supplementary material for: Early life adversity, contact with children’s social care services and educational outcomes at age 16 years: UK birth cohort study with linkage to national administrative records
Source: PubMed Central journal article supplement (PMC6797348; doi:10.1136/bmjopen-2019-030213), 2019-10-07

**Supplementary Figure 1: Partner, child and teacher questionnaire response rates by child social care status**

— No CLA or CIN record  
 - - - CIN (no CLA) record  
 — CLA record

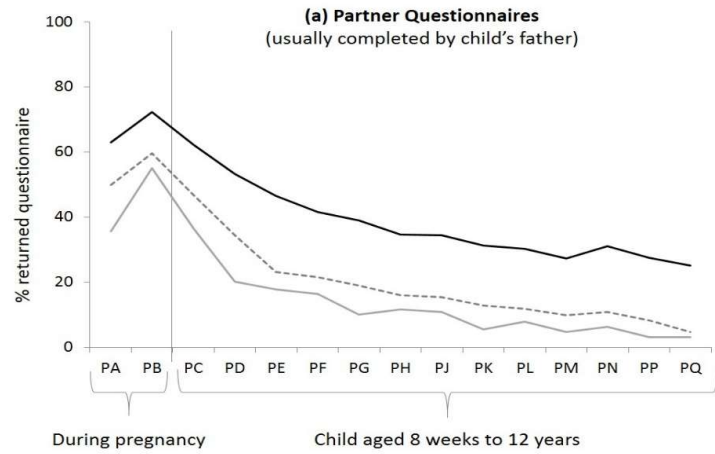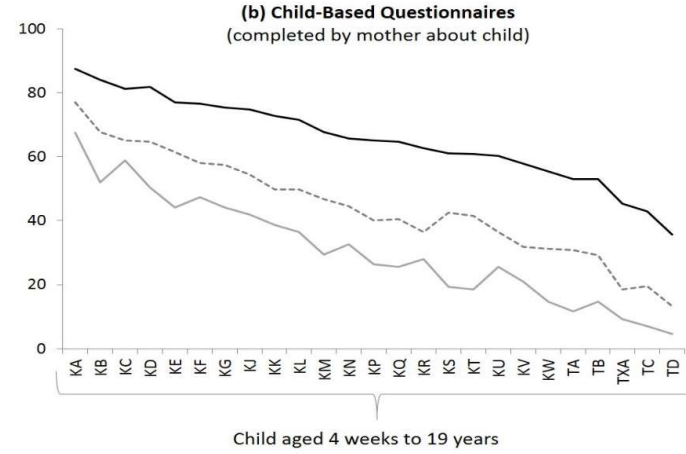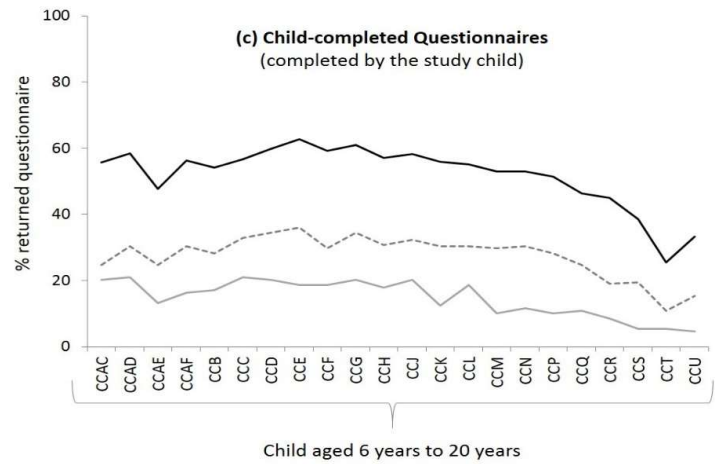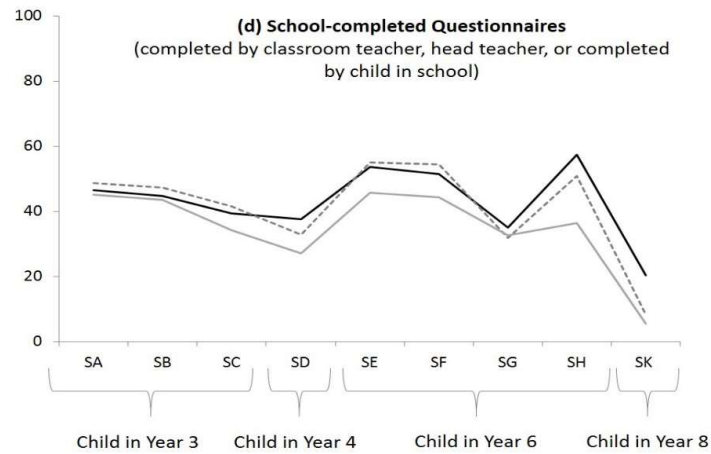

Supplement: bmjopen-2019-030213supp003.pdf [file bmjopen-2019-030213supp003.pdf]
